1 **Variant Phasing and Haplotypic Expression from Single-molecule**

2 **Long-read Sequencing in Maize**

3

4 Bo Wang<sup>1</sup>, Elizabeth Tseng<sup>2</sup>, Primo Baybayan<sup>2</sup>, Kevin Eng<sup>2</sup>, Michael Regulski<sup>1</sup>, Yinping Jiao<sup>1</sup>,

5 Liya Wang<sup>1</sup>, Andrew Olson<sup>1</sup>, Kapeel Chougule<sup>1</sup>, Peter Van Buren<sup>1</sup>, Doreen Ware<sup>1,3\*</sup>

6

7

8

9

10

11 <sup>1</sup> Cold Spring Harbor Laboratory, Cold Spring Harbor, New York, United States of America

12 <sup>2</sup> Pacific Biosciences, 1380 Willow Road, Menlo Park, California, United States of America

13 <sup>3</sup> USDA ARS NEA Robert W. Holley Center for Agriculture and Health Cornell University,

14 Ithaca, New York, United States of America

15

16

17 \*Corresponding author:

18 E-mail: [ware@cshl.edu](mailto:ware@cshl.edu)

19 **Abstract**

20 Haplotype phasing of genetic variants is important for interpretation of the maize  
21 genome, population genetic analysis, and functional genomic analysis of allelic  
22 activity. Accordingly, accurate methods for phasing full-length isoforms are  
23 essential for functional genomics study. In this study, we performed an isoform-  
24 level phasing study in maize, using two inbred lines and their reciprocal crosses,  
25 based on single-molecule full-length cDNA sequencing. To phase and analyze full-  
26 length transcripts between hybrids and parents, we developed a tool called  
27 IsoPhase. Using this tool, we validated the majority of SNPs called against  
28 matching short read data and identified cases of allele-specific, gene-level, and  
29 isoform-level expression. Our results revealed that maize parental and hybrid lines  
30 exhibit different splicing activities. After phasing 6,847 genes in two reciprocal  
31 hybrids using embryo, endosperm and root tissues, we annotated the SNPs and  
32 identified large-effect genes. In addition, based on single-molecule sequencing, we  
33 identified parent-of-origin isoforms in maize hybrids, different novel isoforms  
34 between maize parent and hybrid lines, and imprinted genes from different tissues.  
35 Finally, we characterized variation in cis- and trans-regulatory effects. Our study  
36 provides measures of haplotypic expression that could increase power and  
37 accuracy in studies of allelic expression.

38

## 39 **Introduction**

40 Phasing of genetic variants is crucial for identifying putative causal variants and  
41 characterizing the relationship between genetic variation and phenotype [1]. Maize  
42 is a diploid organism that not only has high genetic diversity, but also exhibits  
43 allele-specific expression (ASE) [2,3,4], i.e., unequal transcription of parental  
44 alleles. The effects of ASE vary by cell/tissue type, developmental stage, and  
45 conditions [5]. Because alleles from the same gene can generate heterozygous  
46 transcripts with distinct sequences, a comprehensive analysis of ASE is necessary  
47 in order to achieve a thorough understanding of transcriptome profiles [6,7].  
48 Previously, ASEs were studied using short-read RNA-seq, which could quantify  
49 alleles at the SNP level but was unable to provide full-length haplotype  
50 information [8,9]. Third-generation sequencing technologies such as PacBio and  
51 Oxford Nanopore offer full-length transcript sequencing that eliminates the need  
52 for transcript reconstruction, and these methods have been widely adopted for  
53 genome annotations [10–14]. However, only a handful of studies used long reads  
54 for isoform-level haplotyping [6].

55 In this study, we used the Pacific Biosciences Sequel platform to produce a single-  
56 molecule full-length cDNA dataset for two maize parental lines, the temperate line  
57 B73 and the tropical line Ki11, as well as their reciprocal hybrid lines (B73 × Ki11;

58 Ki11 × B73). We also sequenced RNAs from the same tissues using 150-bp  
59 paired-end (PE) sequencing on the Illumina platform. We developed a tool called  
60 IsoPhase to phase the allelic isoforms in the hybrids based on the single-molecule  
61 transcriptome datasets. This is the first full-length isoform phasing study in maize,  
62 or in any plant, and thus provides important information for haplotype phasing in  
63 other species, including polyploid species. Using IsoPhase, we demonstrated that  
64 haplotype phasing by full-length transcript sequencing can reveal allele-specific  
65 expression in maize reciprocal hybrids. Our approach does not require parental  
66 information (although parental data could be used to assign maternal and paternal  
67 alleles) and can be applied to exclusively long-read data. Moreover, we show that  
68 single molecules can be attributed to the alleles from which they were transcribed,  
69 yielding accurate allelic-specific transcriptomes. This technique allows the  
70 assessment of biased allelic expression and isoform expression.

71

## 72 **Results**

### 73 **Full-Length Transcript Sequencing and Bioinformatics Pipeline**

74 Reciprocal hybrids of the maize inbred lines B73 and Ki11 exhibited dramatic  
75 heterosis in plant height, primary and lateral root number, biomass and 100-kernel  
76 Weight (S1A–S1H Fig), making this group well suited to the allelic study of

77 heterosis. To identify as many transcripts as possible, we extracted high-quality  
78 RNA from root, embryo, and endosperm of B73, Ki11, as well as their reciprocal  
79 crosses (B73 × Ki11, Ki11 × B73), and subjected the RNA to reverse transcription.  
80 Tissue-specific barcodes were added before pooling for subsequent amplification.  
81 Barcoded SMRTBell libraries were sequenced on a PacBio Sequel 1M platform  
82 with 15 SMRT Cells using 2.1 chemistry, yielding 4,898,979 circular consensus  
83 sequences (CCS, also called reads of insert). We pooled the reads from all four  
84 lines and processed them using the IsoSeq3 workflow (Fig 1); 76.3% (3,739,812)  
85 of reads were classified as full-length based on the presence of barcoded primers  
86 and polyA tails (S1 Table). IsoSeq3 processing yielded 250,168 full-length, high-  
87 quality (HQ) consensus transcript sequences.

88 The HQ transcript sequences were then mapped to the maize RefGen\_v4  
89 genome assembly [14] using minimap2 [15]. Of the 250,168 HQ sequences,  
90 248,424 (99.3%) were mapped to the genome, among which 229,757 (91.8%) were  
91 selected according to two criteria: min-coverage 99% and min-identity 95%. These  
92 sequences were further collapsed into 90,419 non-redundant transcripts (S2 Table).  
93 Using the QC tool SQANTI [16], we discarded 15,301 (16.9%) of the non-  
94 redundant transcripts due to intra-priming, RT switching, or non-canonical  
95 junctions unsupported by matching short-read data (S3 Table). Genome-wide  
96 BLASTN to the NCBI RefSeq NR database revealed that 523 (30%) of the 1,744

97 unmapped sequences fell into gaps in the assembly, whereas the remaining  
98 sequences could be mapped to other organisms, implying that they represented  
99 biological contamination from endophytes or other sources (S4 Table). Our final  
100 dataset consists of 75,118 transcripts covering 23,412 gene loci, with lengths  
101 ranging from 80 to 11,495 bp and an average transcript length of 2,492 bp (S2 Fig).

### 102 **Isoform Characterization in Maize B73, Ki11, and Reciprocal Lines**

103 We used SQANTI to compare reference transcripts against the maize B73  
104 RefGen\_v4 annotation [14], matching 20,068 of the 23,412 loci to a reference gene  
105 locus; the remaining 3,344 transcripts, with an average gene length of 2,350 bp,  
106 were deemed novel. Among these novel transcripts 3,193 (95.5%) are intergenic,  
107 and 319 (4.5%) are antisense. The novel transcripts are not annotated in the  
108 existing maize B73 genome.

109 SQANTI classified the transcripts into six groups (Fig 2A): a] 36,005  
110 (47.9%) isoforms were FSM (full splice matches), matching a reference perfectly  
111 for all exonic junctions; b] 8,910 (11.9%) isoforms were ISM (incomplete splice  
112 matches), matching a reference perfectly but with fewer exons; c] 13,521 (18.0%)  
113 were NIC (novel in catalog), novel isoforms using combinations of known  
114 donor/acceptor sites; d] 13,170 (17.5%) were NNC (novel not in catalog), novel  
115 isoform using at least one novel donor or acceptor site; e] 319 (0.4%) were

116 Antisense; and f] 3,193 (4.3%) were Intergenic. The Iso-Seq data recovered  
117 proportionately just as many full-length reference transcripts at longer read lengths  
118 (Fig 2B), whereas the shortest transcripts (< 1 kb) and novel genes were enriched  
119 for mono-exonic transcripts (Fig 2C–2D), of which 44.3% (4,702) were non-  
120 coding. In addition, we identified alternative start and end sites for these transcripts  
121 (Fig 2E–2F).

122

123 We then demultiplexed the pooled transcripts by looking at the number of reads  
124 associated with each strain-tissue (ex: B73-root) in each transcript. If a sample had  
125 at least one full-length read associated with a transcript, it was considered to be  
126 expressed. Each sample contained between 20,000 and 30,000 expressed  
127 transcripts, with relatively similar length distributions (S5 Table and S3 Fig). To  
128 determine the degree of saturation of the data, we subsampled the full-length reads  
129 associated with the transcripts by strain and by tissue; the results of this analysis  
130 revealed that the Iso-Seq data was saturated at the gene level, but was still  
131 revealing additional diversity at the transcript level (S4A–S4D Fig). Note, however,  
132 that this saturation analysis was limited by the input library size and subject to  
133 sequencing bias on the PacBio platform.

134

135 Comparison of genes/isoforms between parents and hybrids revealed that  
136 reciprocal F1s exhibited maternal dominance (S5 Fig). We found a number of  
137 shared and genotype-specific genes and isoforms between the parental line and two  
138 hybrids (S6 Fig). Investigation of the main splicing patterns revealed that intron  
139 retention was the dominant pattern across these four genotypes, and alternative last  
140 exon the least common pattern (S7A–S7C Fig). Quantification using Illumina short  
141 reads showed that most genes exhibited additive expression patterns in three  
142 tissues. We also observed differences between the two reciprocal hybrids:  
143 specifically, B73 × Ki11 had more non-additive genes than Ki11 × B73 (S8A–S8C  
144 Fig), which could contribute to phenotypic differences between these two hybrid  
145 lines. However, there were no significant differences in the number of isoforms  
146 between genes with additive expression and those with non-additive expression,  
147 nor were there differences in genes with non-additive expression between the two  
148 reciprocal hybrids (S9A–S9C Fig).

149

### 150 **Full-Length Transcripts Enable Accurate Haplotyping**

151 To phase Iso-Seq transcripts, we developed a new tool called IsoPhase. For each  
152 gene, we aligned all full-length reads to the gene region, and then called SNPs  
153 individually (currently, IsoPhase only calls substitution SNPs). We then used the  
154 full-length read information to reconstruct the haplotypes and used a simple error



155 correction scheme to obtain the two alleles (Fig 3A). To determine which allele  
156 belongs to B73 or Ki11, we took advantage of the fact that all B73 reads must only  
157 express one allele, and all Ki11 reads must only express the other. Once the  
158 parental alleles were identified, we obtained the allelic counts for the F1 hybrids  
159 (Fig 3B). We applied IsoPhase to the 9,463 genes that had at least 40 FL read  
160 coverage, of which 6,907 had at least one SNP and could be readily classified as  
161 the B73 or Ki11 alleles.

162

163 We validated the SNPs called from IsoPhase using short-read data. Considering  
164 only substitution SNPs at positions for which there was at least 40 FL read  
165 coverage, 96% (74280 of 77540) of IsoPhase SNPs were validated by short-read  
166 data. The remaining 4% (3260) of SNPs that were PacBio-specific were mostly  
167 due to insufficient coverage of the UTR regions by short-read data. Conversely,  
168 short reads identified an additional 26,774 SNPs in the regions that were not  
169 confirmed by IsoPhase. There were several reasons for this: (1) low or dropped  
170 coverage of Iso-Seq data; (2) alignment artifacts; and (3) indels masquerading as a  
171 series of consecutive SNPs. Both short read and Iso-Seq data showed variable  
172 coverage at the 5' ends. In some cases, short-read data called additional 5' SNPs  
173 (Fig 4A). At positions where short reads called a SNP but Iso-Seq had sufficient  
174 coverage, however, read mis-alignment was a common issue (S10A–S10B Fig). In

175 summary, we have confidence in the joint SNP calls, and attribute the unique SNP  
176 calls to either false negatives (due to low coverage) or false positives (due to mis-  
177 alignment).

### 178 **Full-Length Transcript Reads Reveal Allelic Specific Expression**

179 An advantage of full-length transcript sequencing is the ability to characterize  
180 isoforms with haplotype information. Among the highly expressed genes, we  
181 observed cases of allelic specific expression. For example, only the maternal allele  
182 of the gene Zm00001d037529 (PB.16588) was expressed in the F1 hybrids, and  
183 both Iso-Seq and short-read data supported maternal-only expression (Fig 4B). The  
184 Zm00001d040612 (PB.8517) gene provides a remarkable example of allelic-  
185 specific isoform expression. Its two most abundant isoforms were PB.8517.1 and  
186 PB.8517.4, which differ only in the last exon: PB.8517.4 has a single 3' exon,  
187 whereas in PB.8517.1 the last exon is spliced into two exons. In B73, PB.8517.4  
188 was expressed but PB.8517.1 was not, whereas in Ki11 the opposite pattern was  
189 observed. In both F1 hybrids, both isoforms were expressed, but only the Ki11  
190 allele was detected for the PB.8517.1 isoform, whereas only the B73 allele was  
191 detected for the PB.8517.4 isoform (Fig 5). Short-read junction data supported this  
192 observation. In total, we identified 221 monoallelic genes in embryo, 527 in  
193 endosperm, and 271 in root (S11A Fig). Comparison of the number of isoforms in

194 these monoallelic genes revealed differences among the three tissues: in embryo  
195 and root, the two reciprocal hybrids were inclined to exhibit the maternal effect  
196 pattern, whereas in endosperm, reciprocal hybrid B73 × Ki11 had more isoforms  
197 (S11B Fig).

198

199 We conclude that while short-read data achieves higher sequencing depth and can  
200 call more SNPs, full-length transcripts deliver accurate haplotype information with  
201 high specificity and can be used to study allele-specific expression. In future work,  
202 combining the deep coverage of short read data with full-length long-read data  
203 should drastically improve both the sensitivity and specificity of transcript  
204 haplotyping.

205

## 206 **Functional Annotation of the SNPs**

207 We performed functional annotation of SNPs called by IsoPhase using the maize  
208 reference genome annotation v4. Among all SNPs, 24% were synonymous variants.  
209 Of the non-synonymous variants, 22,093 had potential large effects on the function  
210 of 5,140 genes, including 21,685 missense, 287 splice donor/acceptor, and 243  
211 stop gained/retained variations. In addition, 10% and 17% variants were in 3'  
212 UTRs and 5' UTRs, respectively (Fig 6A–6B). Among those, 2,556 genes had  
213 SIFT (sort intolerant from tolerant) scores < 0.05 and were therefore predicted to

214 be deleterious mutations. Gene Ontology analysis revealed that most of the large-  
215 effect genes were associated with ‘molecular function’ terms related to catalytic  
216 activity and binding, and ‘biological process’ terms related to metabolic and  
217 cellular processes (Fig 6C). The resultant differences in these processes could  
218 contribute to the phenotypic differences between Ki11 and B73, as well as the  
219 differences between the hybrids and their parents. We also found that these large-  
220 effect genes had more isoforms in root and embryo tissues in B73, but more  
221 isoforms in endosperm tissue in Ki11. In addition, the number of isoforms in the  
222 two reciprocal hybrids exhibited the high-parent value in root and embryo, but not  
223 in endosperm, suggesting that genes in endosperm play a role in determining the  
224 developmental differences between B73 and Ki11 plants (Fig 6D–6F).

225

### 226 **Imprinted genes and cis-/trans-regulatory effects**

227 We identified a number of imprinted genes based on the phasing results from  
228 IsoPhase: 172 paternally inherited genes in embryo, 221 in endosperm, and 200 in  
229 root; and 193 maternally inherited genes in embryo, 326 in endosperm, and 196 in  
230 root. The expression of each allele confirmed the paternal and maternal expression  
231 pattern of these imprinted genes (Fig 7A–7F). Comparison of splicing patterns  
232 between parents and hybrids revealed that overall intron retention was the  
233 predominant pattern across the four genotypes, regardless of tissue and paternal or

234 material imprinting; however, the proportion of each splicing pattern varied among  
235 genotypes in specific tissues (Fig 7G–7L).

236  
237 Variation in cis- and trans-regulation can be distinguished by allelic expression  
238 ratios between parents relative to the F1 interspecific hybrid or allotetraploid. In  
239 order to see cis- and trans-effects on gene expression divergence, we calculated the  
240 allelic ratios in parents and reciprocal hybrids from the phasing results, and used  
241 this information to identify genes with cis or trans effects. The results revealed that  
242 cis + trans effects were predominant in the two hybrids among all the three tissues,  
243 following by cis  $\times$  trans effects; conserved genes were the least common (S12A  
244 Fig). In addition, the number of isoforms was slightly higher in conserved genes  
245 than in genes with other effects (S12B Fig).

246

## 247 **Discussion**

248

249 Maize is a diploid important genetic model for elucidating transcriptional networks.  
250 Recently, full-length transcript sequencing using long-read technology has enabled  
251 us to characterize alternative splicing events and improve the maize genome  
252 annotation [14,17]. However, the general Iso-Seq algorithm ignores SNP-level  
253 information, focusing instead on identifying alternative splicing differences.

254 Heterosis has been extensively studied in plants using transcriptome sequencing  
255 approaches, revealing differentially expressed genes and biased expressions  
256 between parents and hybrid lines [18–20]. The results of these studies have  
257 provided clues about the molecular mechanisms underlying plant heterosis [21]. To  
258 date, however, no study has characterized allelic expression at single-molecule  
259 full-length transcript level. Maize, with its high diversity, provides an excellent  
260 model for studying heterosis.

261

262 On the other hand, transcriptome sequencing has a wide variety of applications,  
263 including evaluation of differences in gene expression between tissues, conditions,  
264 etc. By contrast, allele-specific expression analysis evaluates expression  
265 differences between two parental alleles in their hybrids. Both differential and  
266 allele-specific expression analyses have been employed to study heterosis using  
267 traditional RNA-seq [22,23], but the short read lengths of this technique make it  
268 impossible to construct the parental origins at the full-length transcript level. Full-  
269 length, single-molecule sequencing provides an unprecedented allele-specific view  
270 of the haploid transcriptome. Haplotype phasing using long reads allowed us to  
271 accurately calculate allele-specific transcript and gene expression, as well as  
272 identify imprinted genes and investigate the cis/trans regulatory effects.  
273 Sequencing of full-length haplotype-specific isoforms enabled accurate assessment

274 of allelic imbalance, which could be used to study the molecular mechanisms  
275 underlying genetic or epigenetic causative variants and associate expression  
276 polymorphisms with plant heterosis.

277

278 Maize is an excellent model for haplotype phasing study, as it is very polymorphic  
279 as well as both inbreds and hybrids are easily obtainable and reference genomic  
280 sequence is available. In this study, we sequenced full-length cDNAs in two  
281 reciprocal hybrids and their parental lines using the PacBio Iso-Seq method. To  
282 phase isoforms in the hybrids, we developed IsoPhase, an accurate method for  
283 reconstructing haplotype-specific isoforms. Based on the assumption that the SNPs  
284 in each inbred line are homozygous, our method uses splice mapping to partition  
285 the reads into parental haplotypes. Using IsoPhase, we successfully phased 6,847  
286 genes using single-molecule sequencing data from maize reciprocal F1 hybrids and  
287 their parents. It is important to note that we only phased genes supported by more  
288 than 40 FL reads; the rest of the genes were not phased due to the sequencing  
289 depth cutoff. In addition, we used short-read data from the same tissues to confirm  
290 the SNPs called from long-reads sequencing, giving us high confidence in the  
291 resultant phased genes. This is the first full-length isoform phasing study in maize,  
292 or in any plant, and thus provides important information for haplotype phasing to  
293 other organisms, including polyploid species. IsoPhase can also be used for self-

294 incompatible species for haplotype phasing, although a high level of  
295 heterozygosity in such species makes it very challenging and would require deeper  
296 sequencing.

297

298 We noticed that the allelic expression of phased genes varied among tissues.  
299 Among the phased genes, we also identified imprinted genes in endosperm,  
300 embryo and root, and we found that genes expressed in the embryo had more  
301 isoforms than imprinted genes expressed in endosperm and root. However, due to  
302 the large number of full-length reads required for high-confidence phasing by  
303 IsoPhase, future studies involving large-scale deep sequencing will be required to  
304 phase all genes in maize.

305

## 306 **Methods**

### 307 **Plant materials**

308 Maize inbred lines B73 and Ki11 were grown at CSHL Uplands Farm, and reciprocal crosses  
309 were made between the two lines. For tissue collection, embryo and endosperm at 20 DAP (days  
310 after pollination) were collected for each genotype in two biological replicates, and root tissues  
311 were collected at 14 DAG (days after germination). All tissues were immediately frozen in liquid  
312 N<sub>2</sub>. For each tissue, at least 10 plants were pooled in each biological replicate.

313



## 314 **RNA preparation**

315 Total RNA was prepared by grinding tissue in TRIzol reagent (Invitrogen 15596026) on dry ice  
316 and processing as recommended by the manufacturer. To remove DNA, an aliquot of total RNA  
317 was treated with RQ1 DNase (Promega M6101), followed by phenol/chloroform/isoamyl alcohol  
318 extraction and chloroform/isoamyl alcohol extraction using Phase Lock Gel Light tubes (5  
319 PRIME 2302800), and ethanol precipitation. Precipitated RNA was stored at -20°C.

320

## 321 **Illumina RNA-Seq library construction**

322 Total RNA (20 µg) was used for poly(A)<sup>+</sup> selection using oligo(dT) magnetic beads (Invitrogen  
323 610-02), eluted in water, and subjected to RNA-seq library construction using the ScriptSeq™  
324 kit (Epicentre SS10906). Libraries were amplified by 15 cycles of PCR, and then sequenced in  
325 two lanes on the HiSeq 2500 PE150 platform at Woodbury Genome Center, Cold Spring Harbor  
326 Laboratory.

327

## 328 **PacBio library construction and single-molecule sequencing**

329 cDNA was generated from 1 µg of total RNA per sample using the Clontech SMARTer PCR  
330 cDNA Synthesis Kit (catalog# 634925 or 634926) according to PacBio's Iso-Seq Template  
331 Preparation for the Sequel System ([https://www.pacb.com/wp-content/uploads/Procedure-  
332 Checklist-Iso-Seq-Template-Preparation-for-Sequel-Systems.pdf](https://www.pacb.com/wp-content/uploads/Procedure-Checklist-Iso-Seq-Template-Preparation-for-Sequel-Systems.pdf)). cDNAs were barcoded using  
333 barcoded oligo-dT during first-strand synthesis. The 16-bp barcode sequences used for this  
334 study are shown in Additional file 1: S6 Table. The embryo, root, and endosperm cDNAs were  
335 enriched by PCR using PrimeSTAR GXL DNA Polymerase (Clontech, catalog# R050A or

336 R050B). Amplification conditions used were as follows: initial denaturation at 98°C for 30  
337 seconds, followed by 9–12 cycles of 98°C for 10 seconds, 65°C for 15 seconds, and 68°C for 10  
338 minutes. A final extension was performed at 68°C for 5 minutes. After amplification, tissues  
339 (embryo, root and endosperm) from the same strain were pooled in equimolar quantities,  
340 yielding four pools, which were subsequently used to construct SMRTbell libraries using the  
341 SMRTbell Template Prep Kit 1.0 (Pacific Biosciences, Part No. 100-259-100). After library  
342 construction, each SMRTbell library was size-fractionated using SageELF (Sage Science). The  
343 final SMRTbell libraries were annealed with Sequencing Primer v4 (Pacific Biosciences Part No.  
344 101-359-000) and bound with Sequel Binding Kit 2.1 (Pacific Biosciences Part No. 101-429-300).  
345 The polymerase-bound SMRTbell libraries were loaded at 3–10 pM on-plate concentrations and  
346 sequenced using the Sequel Sequencing Kit 2.1 (Pacific Biosciences Part No. 101-312-100) and  
347 Instrument Software v5.1.

#### 348 **Illumina data analysis**

349 Raw reads were aligned to the B73 reference genome (RefGen\_v4) [14] using STAR 2.4.2a [24]  
350 with minimum intron length of 20 bp and maximum intron length of 50 kb; default settings were  
351 used for the other parameters. Quantification of genes and isoforms was performed using  
352 cufflinks version 2.2.1 [25] using the GTF annotation file generated by PacBio sequencing.

353

#### 354 **PacBio data analysis**

355 PacBio data were analyzed by running the IsoSeq3 application in PacBio SMRT Analysis v6.0 to  
356 obtain high-quality, full-length transcript sequences, followed by downstream analysis.

357

#### 358 **Full-Length reads classification**

359 Full-length reads were identified as CCS reads that contained both the 5' and 3' primer and the  
360 polyA tail preceding the 3' primer. The 5' primer consists of the Clontech SMARTer cDNA  
361 primer with an ATGGG overhang. The 3' primer consists of a tissue-specific 16-bp PacBio  
362 barcode followed by the Clontech SMARTer cDNA primer (S6 Table).

363

### 364 **Isoform-level clustering analysis to obtain high-quality transcript sequences**

365 To increase detection of rare isoforms, the demultiplexed FL reads were pooled to perform  
366 isoform-level clustering analysis [26]. After clustering, consensus sequences were called using  
367 the Arrow algorithm, and only polished sequences with predicted consensus accuracy  $\geq 99\%$   
368 were considered high-quality (HQ) and retained for the next step.

369

### 370 **Mapping to B73 genome and filtering**

371 The HQ transcript sequences were mapped to B73 RefGen\_v4 genome using minimap2 (version  
372 2.11-r797) [15] using parameters '-ax splice -t 30 -uf --secondary=no -C5'. We then filtered for  
373 alignments with  $\geq 99\%$  coverage and  $\geq 95\%$  identity and removed redundancy using scripts from  
374 cDNA\_Cupcake ([http://github.com/Magdoll/cDNA\\_Cupcake](http://github.com/Magdoll/cDNA_Cupcake)). The full list of commands used at

375 this step is as follows:

```
376 minimap2 -ax splice -uf -C5 --secondary=no B73_RefV4.fa hq.fastq > hq.fastq.sam  
377 sort -k 3,3 -k 4,4n hq.fastq.sam > hq.fastq.sorted.sam  
378 collapse_isoforms_by_sam.py --input hq.fastq --fq -s hq.fastq.sorted.sam \  
379     -c 0.99 -i 0.95 --dun-merge-5-shorter -o hq.no5merge  
380 get_abundance_post_collapse.py hq.no5merge.collapsed cluster_report.csv  
381 filter_away_subset.py hq.no5merge.collapsed
```

382

### 383 **Removing potential artifacts using SQANTI**

384 We applied further filtering criteria to remove potential genomic contamination and rare PCR  
385 artifacts. We run a modified version of SQANTI [16] that categorizes each isoform according to  
386 existing B73 RefGen\_v4 annotations and a list of short-read junctions from the same samples.  
387 An isoform is retained in the dataset if: 1) it is FSM/ISM/NIC and does not have intra-priming; 2)  
388 It is NNC, does not have intra-priming, is not RT-switching, and all junctions are either all  
389 canonical or supported by short reads; or 3) it is antisense, intergenic, genic, does not have intra-  
390 priming, is not RT-switching, and all junctions are either all canonical or supported by short  
391 reads. The rationale behind the filtering is to eliminate artifacts that come from intra-priming (dT  
392 priming off genomic 'A' stretches), potential RT-switching, and other library or sequencing  
393 errors that could introduce erroneous splice junctions. Isoforms that are categorized as  
394 FSM/ISM/NIC are isoforms that use all known splice junctions, and are therefore trusted. For all  
395 other categories, we only retain the isoform if the junctions are either canonical or supported by  
396 short reads. This approach yields a high-confidence dataset that is well-supported by existing  
397 annotation and matching short-read data.

398

### 399 **De-multiplex final isoforms by sample and rarefaction analysis by subsampling**

400 We recovered the relative abundance of each the final isoforms in each sample by extracting the  
401 fraction of full-length reads supporting each isoform from each sample. To draw rarefaction  
402 curves, we used the unique Iso-Seq IDs (format: PB.X.Y) to indicate unique transcripts and the  
403 matching reference gene name (ex: Zm00001d027230) from B73 annotation. If a gene was novel,  
404 we created a novel gene ID (ex: novelGene\_124) for each non-overlapping strand-specific locus.  
405 Subsampling was performed at 10,000 FL read intervals for 100 iterations, taking the average  
406 number of unique transcript/genes observed to plot the rarefaction curves.

407

## 408 **SNP calling and phasing using Iso-Seq data**

409 All full-length reads from all 12 samples were aligned to the B73 RefGen\_v4 genome using  
410 minimap2 (v2.11-r797) [15] to create a pileup. Then, at each position with at least 10-base  
411 coverage, Fisher's exact test with the Bonferroni correction was applied with a p-value cutoff of  
412 0.01. Only substitution SNPs were called. Then, sample-specific haplotype information was  
413 obtained by looking at the number of FL reads associated with each allele. To account for  
414 residual errors in the FL reads, we error-corrected the haplotypes down to the two dominant  
415 haplotypes (maternal and parental haplotype) that minimizes the edit distance. Functional  
416 annotation of SNPs was performed using SnpEff [27] and Gramene [28] based on the maize B73  
417 genome annotation RefGen\_v4. SIFT 4G [29] was used to predict deleterious mutations through  
418 SciApps platform [30].

419

## 420 **Identification of paternal and maternal imprinted genes**

421 Bm represents the percentage of expression of maternal alleles out of all expressed genes,  
422 including the maternal and paternal alleles. The Bm ratio is calculated for each cross maternal  
423 depth/(maternal + paternal depth) and averaged. The overall mean and standard deviation are  
424 calculated and used to define cutoffs for MEG and PEG variants. A variant is marked MEG if its  
425 Bm is at least two standard deviations above the mean. Conversely, it is marked PEG if its Bm is  
426 at least two standard deviations below the mean.

427

## 428 **Contributions**

429 B.W., E.T., and D.W. conceived the idea for the study; B.W. collected the tissues; M.R.  
430 generated RNA and Illumina libraries; P.B. and K.E. generated the PacBio libraries and data;  
431 B.W., E.T., Y.J., L.W., A.O., and K.C. analyzed the data; and B.W. and E.T. wrote the  
432 manuscript.

### 433 **Accession codes**

434 The data generated in this study, including PacBio Iso-Seq reads and Illumina short reads, have  
435 been submitted to ArrayExpress (<https://www.ebi.ac.uk/arrayexpress/>) under accession numbers  
436 E-MTAB-7837 and E-MTAB-7394. The IsoPhase tool developed in this study is available in the  
437 GitHub repository: [https://github.com/magdoll/cdna\\_cupcake](https://github.com/magdoll/cdna_cupcake).

### 438 **Acknowledgements**

439 This work was supported by USDA-SCA grant # 58-8062-7-008, NSF Gramene grant #1127112  
440 and NSF Rare Alleles grant #1238014. The authors thank Tim Mulligan for assistance with  
441 farming.

### 442 **Competing financial interests**

443 E.T., P.B., and K.E. are full-time employees of Pacific Biosciences. All other authors declare no  
444 competing financial interests.

445

## 446 **References**

447

- 448 1. Castel SE, Mohammadi P, Chung WK, Shen Y, Lappalainen T. Rare variant phasing and  
449 haplotypic expression from RNA sequencing with phASER. *Nat Commun.* 2016; 7:12817.
- 450 2. Springer NM, Stupar RM. Allele-specific expression patterns reveal biases and embryo-  
451 specific parent-of-origin effects in hybrid maize. *Plant Cell.* 2007; 19(8):2391-402.
- 452 3. Stupar RM, Hermanson PJ, Springer NM. Nonadditive expression and parent-of-origin  
453 effects identified by microarray and allele-specific expression profiling of maize endosperm.  
454 *Plant Physiol.* 2007;145(2):411-25.
- 455 4. Waters AJ, Bilinski P, Eichten SR, Vaughn MW, Ross-Ibarra J, Gehring M, Springer NM.  
456 Comprehensive analysis of imprinted genes in maize reveals allelic variation for imprinting  
457 and limited conservation with other species. *Proc Natl Acad Sci U S A.* 2013;  
458 110(48):19639-44.
- 459 5. Gregg C. Known unknowns for allele-specific expression and genomic imprinting effects.  
460 *F1000Prime Rep.* 2014; 6:75.
- 461 6. Deonovic B, Wang Y, Weirather J, Wang XJ, Au KF. IDP-ASE: haplotyping and quantifying  
462 allele-specific expression at the gene and gene isoform level by hybrid sequencing. *Nucleic  
463 Acids Res.* 2017; 45(5):e32.
- 464 7. Waters A, Makarevitch I, Eichten SR, Swanson-Wagner RA, Yeh CT, Xu W, et al. Parent-of-  
465 origin effects on gene expression and DNA methylation in the maize endosperm. *Plant Cell.*  
466 2011; 23(12):4221-33.

- 467 8. Castel SE, Levy-Moonshine A, Mohammadi P, Banks E, Lappalainen T. Tools and best  
468 practices for data processing in allelic expression analysis. *Genome Biol.* 2015 Sep  
469 17;16:195. doi: 10.1186/s13059-015-0762-6.
- 470 9. Shao L, Xing F, Xu C, Zhang Q, Che J, Wang X, Song J, Li X, Xiao J, Chen LL, Ouyang Y,  
471 Zhang Q. Patterns of genome-wide allele-specific expression in hybrid rice and the  
472 implications on the genetic basis of heterosis. *Proc Natl Acad Sci U S A.*  
473 2019;116(12):5653-5658.
- 474 10. Wang B, Tseng E, Regulski M, Clark TA, Hon T, Jiao Y, et al. Unveiling the complexity of  
475 the maize transcriptome by single-molecule long-read sequencing. *Nat Commun.* 2016; 7:  
476 11708.
- 477 11. Abdel-Ghany S, Hamilton M, Jacobi JL, Ngam P, Devitt N, Schilkey F, et al. A survey of  
478 the sorghum transcriptome using single-molecule long reads. *Nat Commun.* 2016; 7: 11706.
- 479 12. Wang B, Regulski M, Tseng E, Olson A, Goodwin S, McCombie WR, et al. A comparative  
480 transcriptional landscape of maize and sorghum obtained by single-molecule sequencing.  
481 *Genome Res.* 2018; 28(6):921-932.
- 482 13. Wang M, Wang P, Liang F, Ye Z, Li J, Shen C, Pei L, et al. A global survey of alternative  
483 splicing in allopolyploid cotton: landscape, complexity and regulation. *New Phytol.* 2018;  
484 217(1):163-178.
- 485 14. Jiao Y, Peluso P, Shi J, Liang T, Stitzer MC, Wang B, et al. Improved maize reference  
486 genome with single-molecule technologies. *Nature.* 2017; 546(7659):524-527.
- 487 15. Li H. Minimap2: pairwise alignment for nucleotide sequences. *Bioinformatics.* 2018;  
488 34(18):3094-3100.
- 489 16. Tardaguila M, de la Fuente L, Marti C, Pereira C, Pardo-Palacios FJ, Del Risco H, et al.



- 490 SQANTI: extensive characterization of long-read transcript sequences for quality control in  
491 full-length transcriptome identification and quantification. *Genome Res.* 2018; 28(7):1096.
- 492 17. Wang B, Kumar V, Olson A, Ware D. Reviving the Transcriptome Studies: An Insight Into  
493 the Emergence of Single-Molecule Transcriptome Sequencing. *Front Genet.* 2019; 10:384.  
494 doi: 10.3389/fgene.2019.00384. eCollection 2019.
- 495 18. Hochholdinger F, Hoecker N. Towards the molecular basis of heterosis. *Trends Plant Sci.*  
496 2007; 12(9):427-32.
- 497 19. Flint-Garcia SA, Buckler ES, Tiffin P, Ersoz E, Springer NM. Heterosis is prevalent for  
498 multiple traits in diverse maize germplasm. *PLoS One.* 2009; 4(10):e7433.
- 499 20. Paschold A, Jia Y, Marcon C, Lund S, Larson NB, Yeh CT, et al. Complementation  
500 contributes to transcriptome complexity in maize (*Zea mays* L.) hybrids relative to their  
501 inbred parents. *Genome Res.* 2012; 22(12):2445-54.
- 502 21. Chen Z. Molecular mechanisms of polyploidy and hybrid vigor. *Trends Plant Sci.* 2010;  
503 15(2):57-71.
- 504 22. Song G, Guo Z, Liu Z, Cheng Q, Qu X, Chen R, et al. Global RNA sequencing reveals that  
505 genotype-dependent allele-specific expression contributes to differential expression in rice  
506 F1 hybrids. *BMC Plant Biol.* 2013; 13:221.
- 507 23. Bell G, Kane N, Rieseberg L, Adams K. RNA-seq analysis of allele-specific expression,  
508 hybrid effects, and regulatory divergence in hybrids compared with their parents from  
509 natural populations. *Genome Biol Evol.* 2013; 5(7):1309-23.
- 510 24. Dobin A, Davis CA, Schlesinger F, Drenkow J, Zaleski C, Jha S, et al. STAR: ultrafast  
511 universal RNA-seq aligner. *Bioinformatics.* 2013; 29, 15-21.

- 512 25. Trapnell C, Roberts A, Goff L, Pertea G, Kim D, Kelley DR, et al. Differential gene and  
513 transcript expression analysis of RNA-seq experiments with TopHat and Cufflinks. *Nat*  
514 *Protoc.* 2012; 7(3):562-78.
- 515 26. Gordon S, Tseng E, Salamov A, Zhang J, Meng X, Zhao Z, et al. Widespread Polycistronic  
516 Transcripts in Fungi Revealed by Single-Molecule mRNA Sequencing. *PLoS One.* 2015; 10,  
517 e0132628.
- 518 27. Cingolani P, Platts A, Wang le L, Coon M, Nguyen T, Wang L, et al. A program for  
519 annotating and predicting the effects of single nucleotide polymorphisms, SnpEff: SNPs in  
520 the genome of *Drosophila melanogaster* strain w1118; iso-2; iso-3. *Fly (Austin).* 2012;  
521 6(2):80-92.
- 522 28. Tello-Ruiz M, Naithani S, Stein JC, Gupta P, Campbell M, Olson A, et al. Gramene 2018:  
523 unifying comparative genomics and pathway resources for plant research. *Nucleic Acids*  
524 *Res.* 2018; 46(D1):D1181-D1189.
- 525 29. Vaser R, Adusumalli S, Leng SN, Sikic M, Ng PC. SIFT missense predictions for genomes.  
526 *Nat Protoc.* 2016; 11(1):1-9.
- 527 30. Wang L, Lu Z, Van Buren P, Ware D. SciApps: a cloud-based platform for reproducible  
528 bioinformatics workflows. *Bioinformatics.* 2018; 34(22):3917-3920.
- 529
- 530

## 531 **Figure Legends**

### 532 **Fig 1. Full-length Transcript Sequencing Workflow.**

533 Full-length transcript data are generated on the PacBio Sequel platform following the  
534 recommended procedure for Iso-Seq multiplexed library preparation. Iso-Seq analysis  
535 demultiplexes each read and removes the barcodes, cDNA primers, and polyA tail. The  
536 demultiplexed reads are pooled and run through an isoform-level clustering algorithm that  
537 produces high-quality transcript sequences, which is then aligned to the reference genome and  
538 removed of artifacts. The genome-mapped genes are then used to run IsoPhase analysis to call  
539 SNPs and haplotypes.

### 540 **Fig 2. Iso-Seq transcript categorization against maize B73 RefGen\_v4 annotation using the** 541 **SQANTI software.**

542 **(A)** Isoform distribution across structural categories. FSM=Full Splice Match: matches a  
543 reference transcript exon by exon. ISM=Incomplete Splice Match: matches a reference transcript  
544 exon by exon, but is missing one or more 5' exons. NIC=Novel In Catalog: novel isoform using  
545 known splice sites. NNC=Novel In Catalog: novel isoform using at least one novel splice site.  
546 Because this analysis is performed after SQANTI filtering, all junctions must be in the  
547 annotation, canonical, or supported by matching short-read data. **(B)** Classification by transcript  
548 length, normalized. **(C)** Transcript lengths, mono vs multi-exon. **(D)** Distribution of mono- vs  
549 multi-exon transcripts. **(E)** Distance to annotated polyadenylation site. **(F)** Distance to annotated  
550 transcription start site.

551 **Fig 3. IsoPhase workflow.**

552 (A) For each gene, full-length reads from all 12 samples are aligned to a gene region. SNPs are  
553 called individually for each position using Fisher's exact test with the Bonferroni correction,  
554 applied with a p-value cutoff of 0.01. Only substitution SNPs are called. The full-length reads are  
555 then used to reconstruct the haplotypes, and a simple error-correction scheme is applied to obtain  
556 the two alleles. (B) To determine which allele is derived from B73 vs Ki11, we use the FL count  
557 information associate with the homozygous parents: B73 would only express the B73 allele,  
558 whereas Ki11 would only express the Ki11 allele.

559

560 **Fig 4. Example of phasing using IsoPhase.**

561 (A) The gene PB.12426 (Zm00001d053356) phased by IsoPhase. The top two tracks show the  
562 B73 and Ki11 FL reads, and the bottom two tracks show the FL reads from the two F1 hybrids,  
563 with the reads segregated by parental origin. SNPs are depicted between the B73 and Ki11 track;  
564 six SNPs are shown. SNPs #2–6 were called based on both long- and short-read data (purple);  
565 SNP #1 was missed by the long-read data due to reduced coverage (blue). (B) IsoPhase can  
566 identify maternal-specific gene expression. The gene PB.16588 (Zm00001d037529) is expressed  
567 in both B73 and Ki11. However, in the F1 hybrids, only the maternal allele is expressed. In Ki11  
568 × B73, the maternal allele is Ki11. In B73 × Ki11, the maternal allele is B73. Short-read data  
569 confirmed this maternal-specific gene expression.

570

571 **Fig 5. IsoPhase identifies allelic-specific isoform expression.**

572 The gene PB.8517 (Zm00001d040612) shows allelic-specific expression. B73 dominantly  
573 expresses the PB.8517.4 isoform, which has an unspliced 3' exon. Ki11 dominantly expresses

574 the PB.8517.1 isoform that has the last 3' exon spliced. The two F1 hybrids express both  
575 isoforms, but each isoform is associated with the parental allele.

576

577 **Fig 6. Annotations of the SNPs called from IsoPhase.**

578 (A) Distribution of different categories of SNPs from variant effect predictor. (B) Proportions of  
579 different categories of SNPs from coding sequences. (C) Gene Ontology analysis of large-effect  
580 genes. (D–F) Number of isoforms of large-effect genes in two parents and reciprocal hybrids  
581 from root (D), endosperm (E) and embryo (F).

582

583 **Fig 7. Allelic expression and alternative splicing patterns of paternal expressed genes (PEG)**  
584 **and maternal expressed (MEG) genes from phasing.**

585 (A–C) Allelic expression of maternal imprinted genes in reciprocal hybrids in embryo (A),  
586 endosperm (B), and root (C). (D–F) Allelic expression of paternal imprinted genes in reciprocal  
587 hybrids in embryo (D), endosperm (E) and root (F). (G–L) Alternative splicing patterns of PEG  
588 and MEG genes between parents and two reciprocal hybrids in embryo (G–H), endosperm (I–J),  
589 and root (K–L). p0 represents the B73 allele; p1 represents the Ki11 allele.

590

591

592 **Supporting information**

593

594 **S1 Table. 16-mer Barcodes corresponding to the sample.**

595

596 **S2 Table. Number of full-length, non-concatemer (FLNC) reads from each of the 12**  
597 **samples after demultiplexing.**

598

599 **S3 Table. Mapping high-quality (HQ) transcript sequences to the genome and filtering**  
600 **criteria.**

601 HQ sequences were mapped to B73 v4 genome and filtered for 99% coverage and 95% identity.

602 Redundant transcripts are collapsed.

603

604 **S4 Table. Removal of library artifacts using a modified version of the SQANTI software.**

605

606 **S5 Table. Top BLASTN hit counts of the unmapped high-quality (HQ) transcript**  
607 **sequences to the NR database.**

608 BLASTN was run with a report best hit with E-value cutoff 0.1, 1669 of 1744 HQ sequences had

609 a BLASTN hit.

610

611 **S6 Table. Sample-specific transcript counts.**

612 Using the demultiplexed full-length reads, we assigned Iso-Seq transcripts back to each sample.

613 If a transcript contained at least one full-length read from a sample, it was considered to be

614 expressed.

**S1 Fig. Phenotype of maize B73, Ki11, and two reciprocal hybrids (B73 × Ki11, Ki11 × B73) at 14DAG and measure of different traits between parents and the hybrids.**

(A) Shoot and root phenotype of B73, Ki11, and the two reciprocal hybrids. (B) Seed phenotype of B73, Ki11, and the two hybrids. (C) Plant height, (D) primary root length, (E) lateral root number, (F–G) biomass, and (H) 100-kernel weight of the parents and hybrids. \*\*  $p < 0.01$ .

**S2 Fig. Length distribution of the final transcript set.**

After mapping the high-quality (HQ) sequences to the B73 v4 genome and filtering for coverage, identity, and running the SQANTI software to remove library artifacts, we obtained 75,118 transcripts. Min: 80 bp, Max: 11,495 bp, Mean: 2,482 bp, 5th–95th percentile, 363–4,975 bp.

**S3 Fig. Sample-specific transcript length distribution.**

Using the demultiplexed full-length reads, we assigned Iso-Seq transcripts back to each sample. If a transcript contains at least one full-length read from a sample, it is considered expressed.

**S4 Fig. Rarefaction curves against known genes and transcripts (A–B) by strain, (C–D) by tissue.**

For each subpanel, the X-axis shows the number of subsampled full-length reads and the Y-axis shows the number of observed unique genes or transcripts. Both known and novel genes/transcripts are considered.

**S5 Fig. Number of genes and isoforms between parents and two reciprocal hybrids in embryo, endosperm, and root.**

**S6 Fig. Overlap of genes and isoforms among parents and two hybrids in embryo, endosperm, and root.**

**S7 Fig. Alternative splicing pattern between parents and two reciprocal hybrids in embryo (A), endosperm (B), and root (C).**

**S8 Fig. Number of additive and non-additive expression genes in embryo (A), endosperm (B), and root (C).**

**S9 Fig. Number of isoforms of additive and non-additive expression genes in embryo (A), endosperm (B) and root (C).**

**S10 Fig. IsoPhase phasing example.** (A) The gene PB.21897 (Zm00001d045657) phased by IsoPhase. SNPs are depicted between the B73 and Ki11 track; seven SNPs are shown. SNP #2–#7 were called based on both long and short read data (purple), SNP #1 was missed by long read due to reduced coverage (blue); suspicious short read-only SNPs are marked in red. (B) Zoomed-in region between SNP #6 and SNP #7 showing suspicious SNPs (red) called based on short read data only. Top track shows Ki11 Iso-Seq FL reads; bottom track shows Ki11 short reads.

**S11 Fig. Expression and number of isoforms of mono-allelic genes in different tissues.**

(A) Allelic expression of mono-allelic genes in reciprocal hybrids, and (B) number of isoforms between parents and hybrids of mono-allelic genes. p0 represents the B73 allele; p1 represents the Ki11 allele.



**S12 Fig. Distribution of cis-, trans-regulated genes, and number of isoforms of each category.**

(A) Distribution of different cis-, trans-regulated genes. (B) Number of isoforms in each category of cis-, trans-regulated genes.



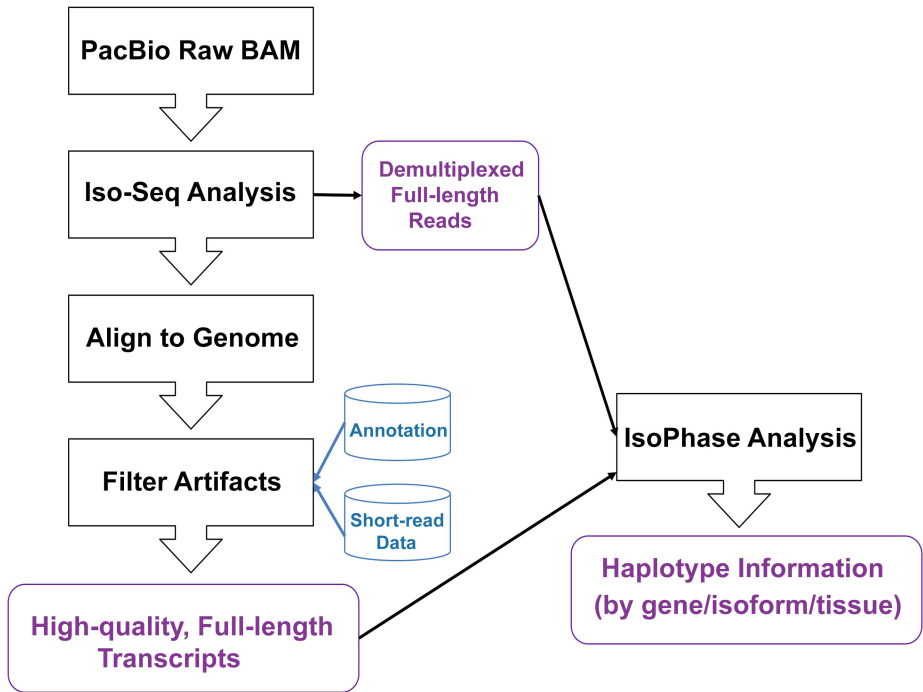

### A Isoform distribution across structural categories

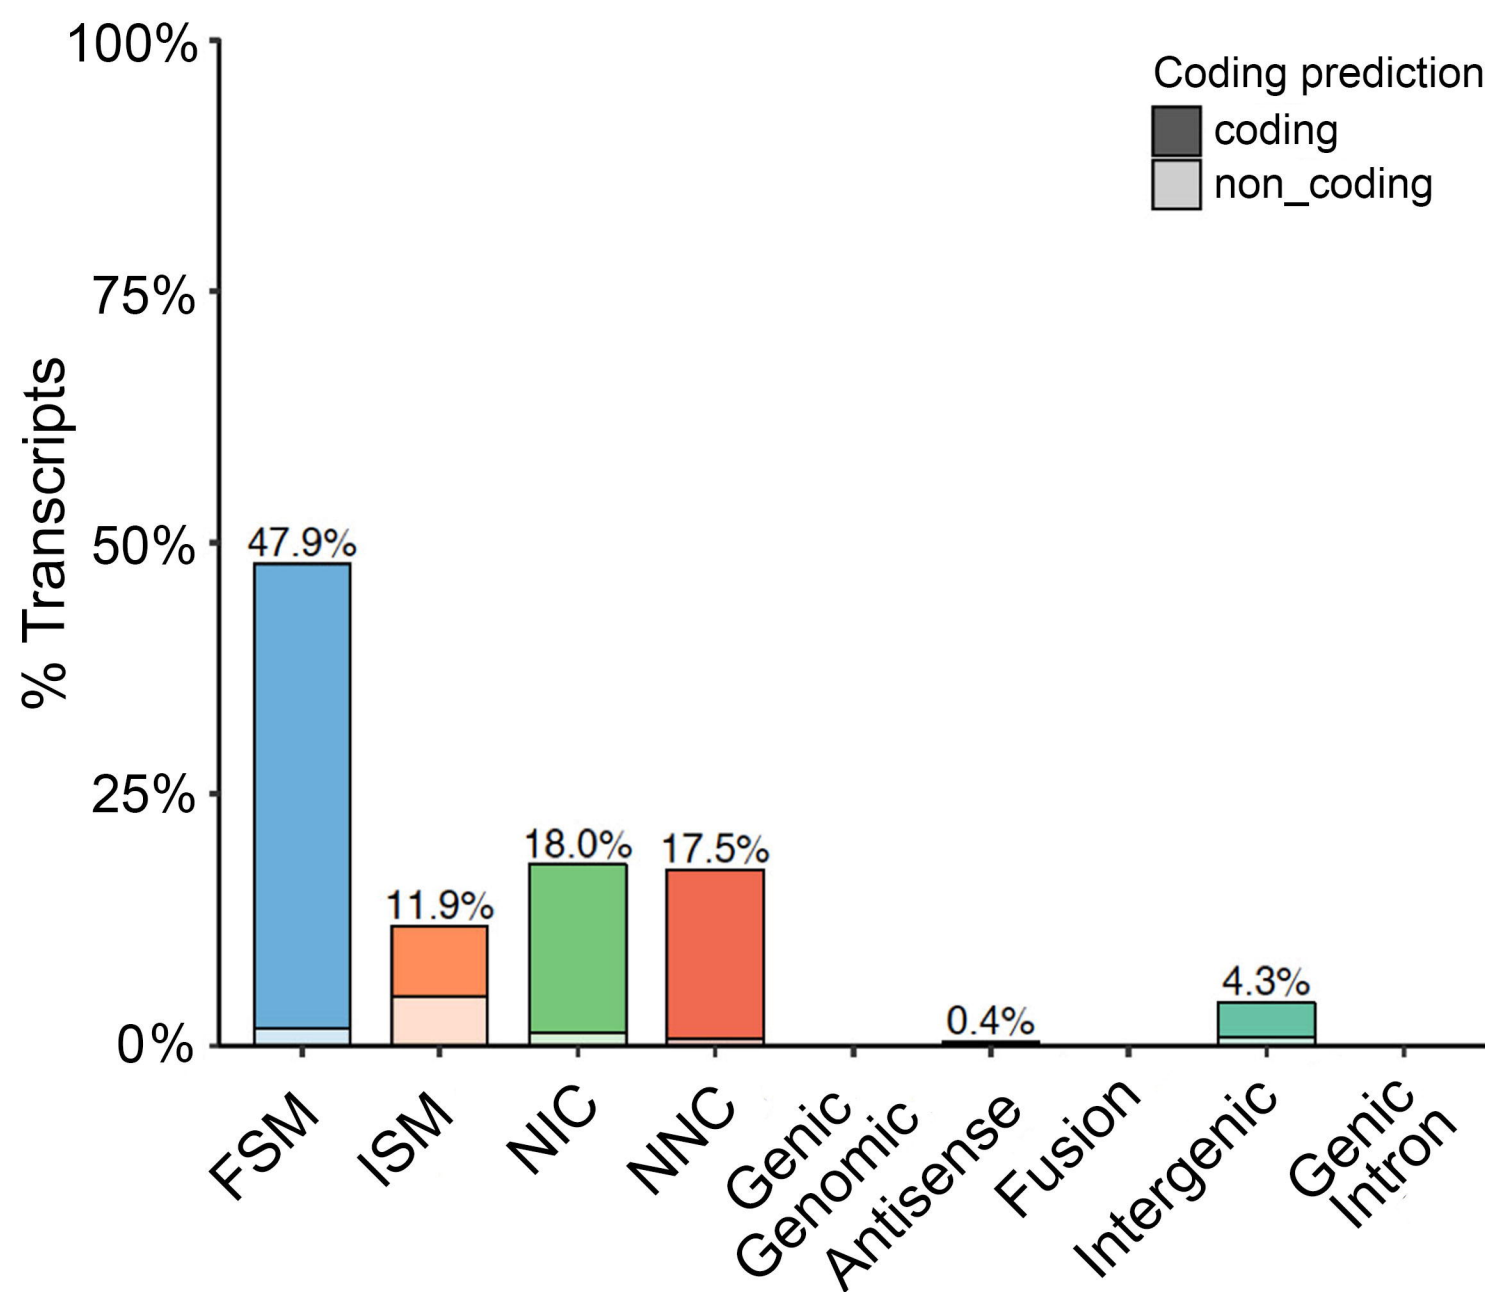

### B Classification by transcript length, normalized

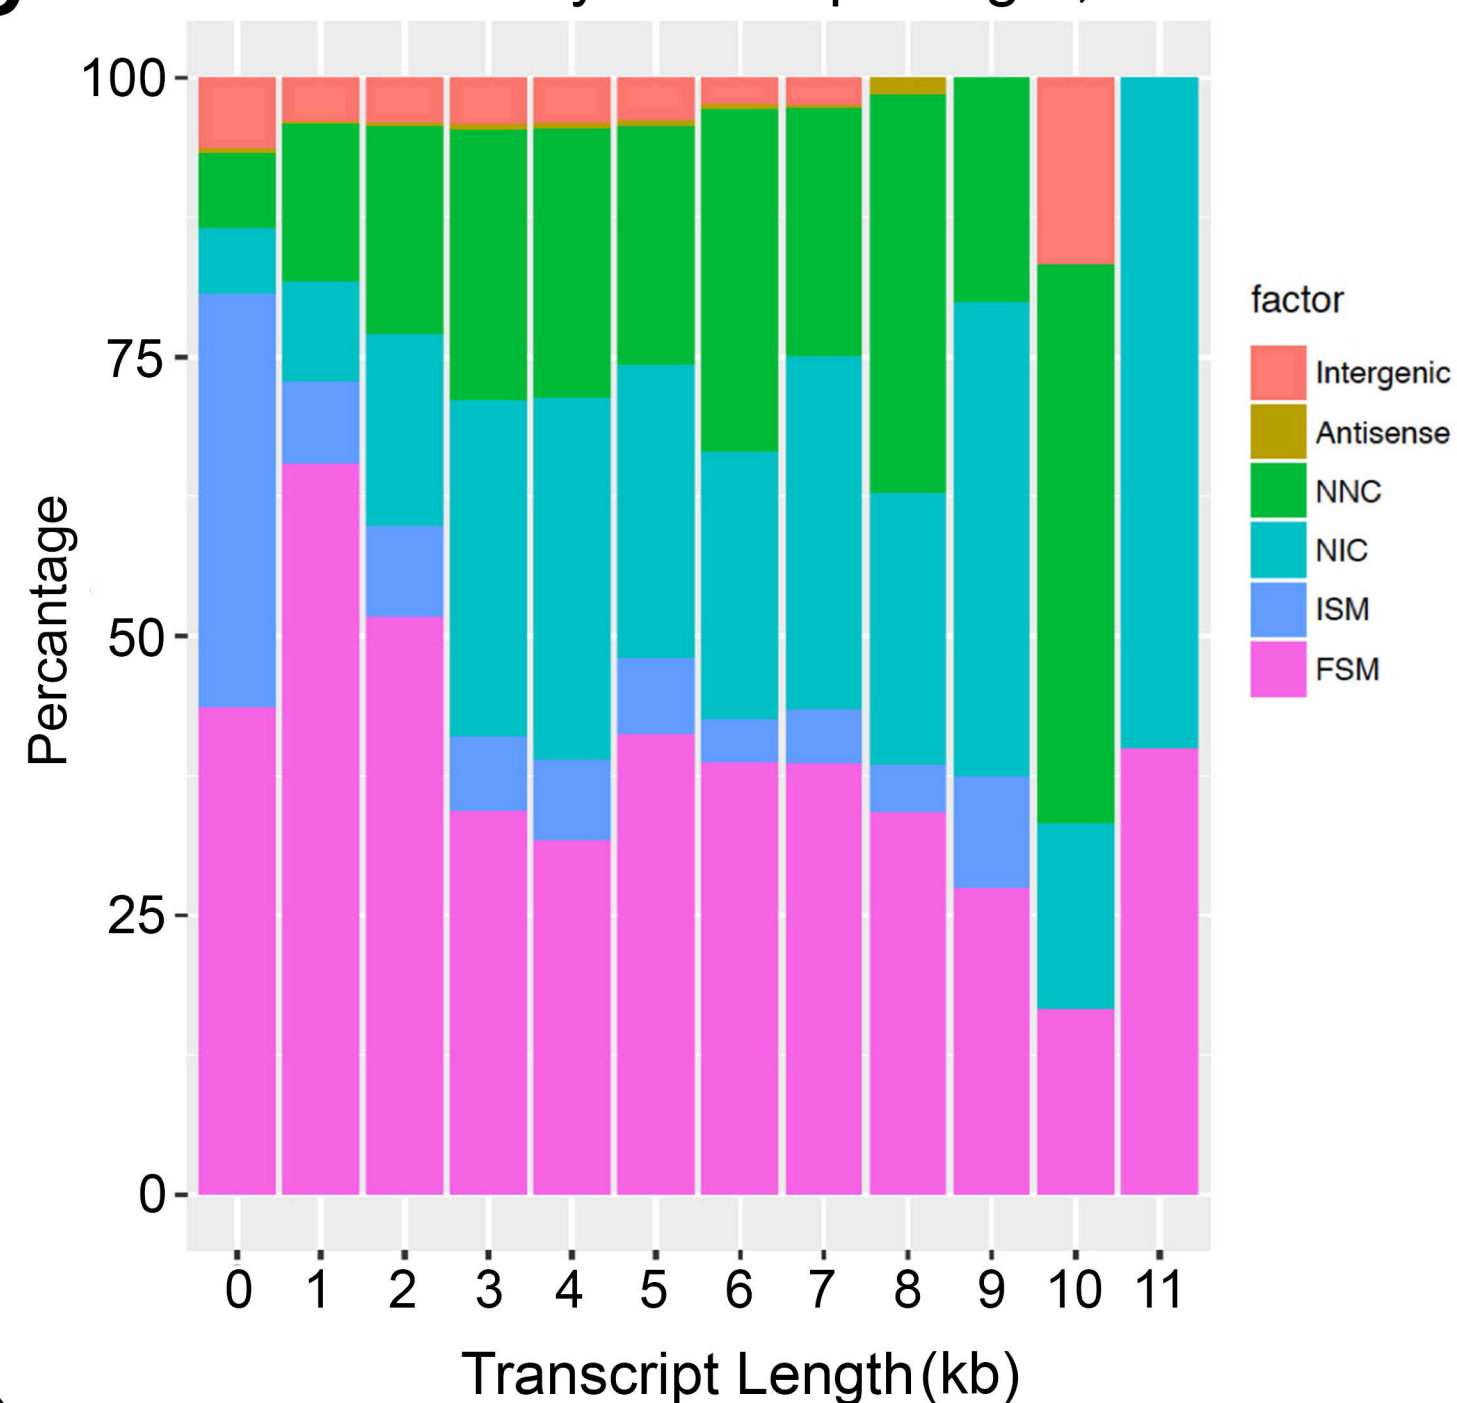

### C Transcript Lengths, Mono- vs Multi-Exons

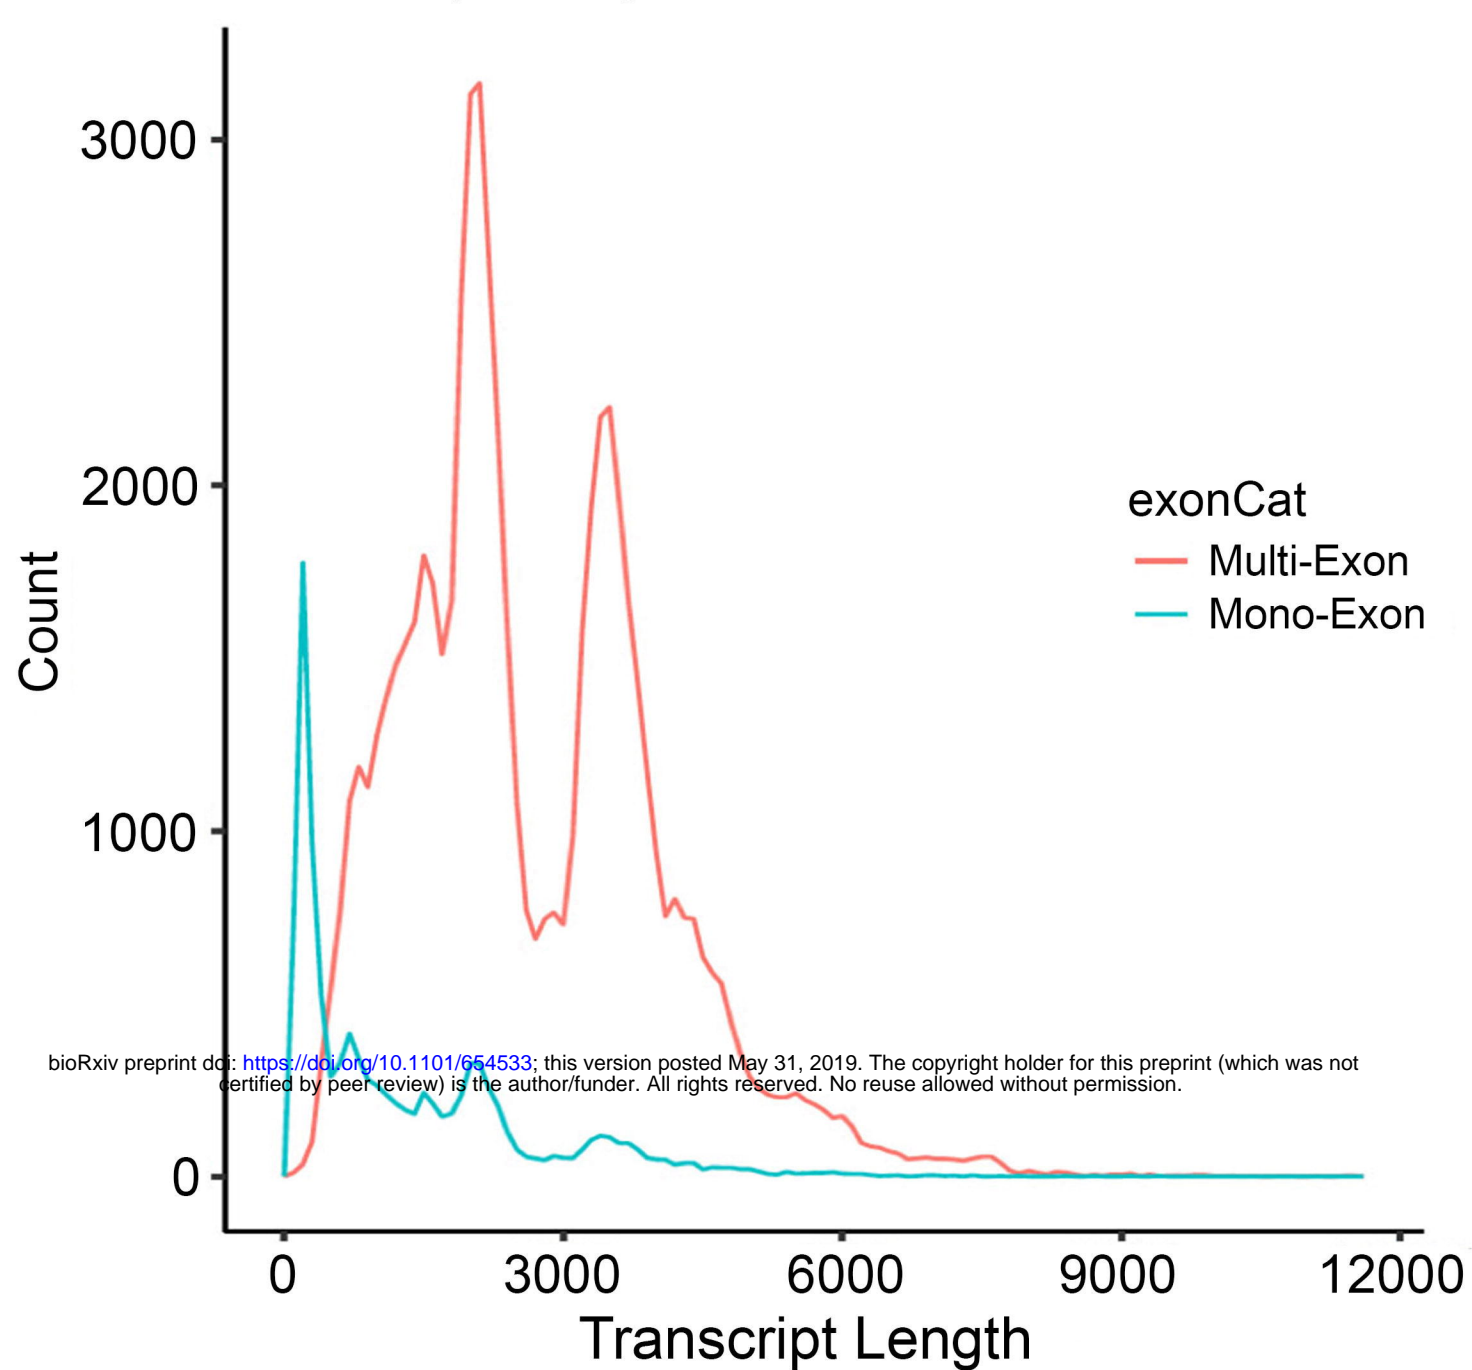

### D Distribution of Mono- vs Multi-Exon Transcripts

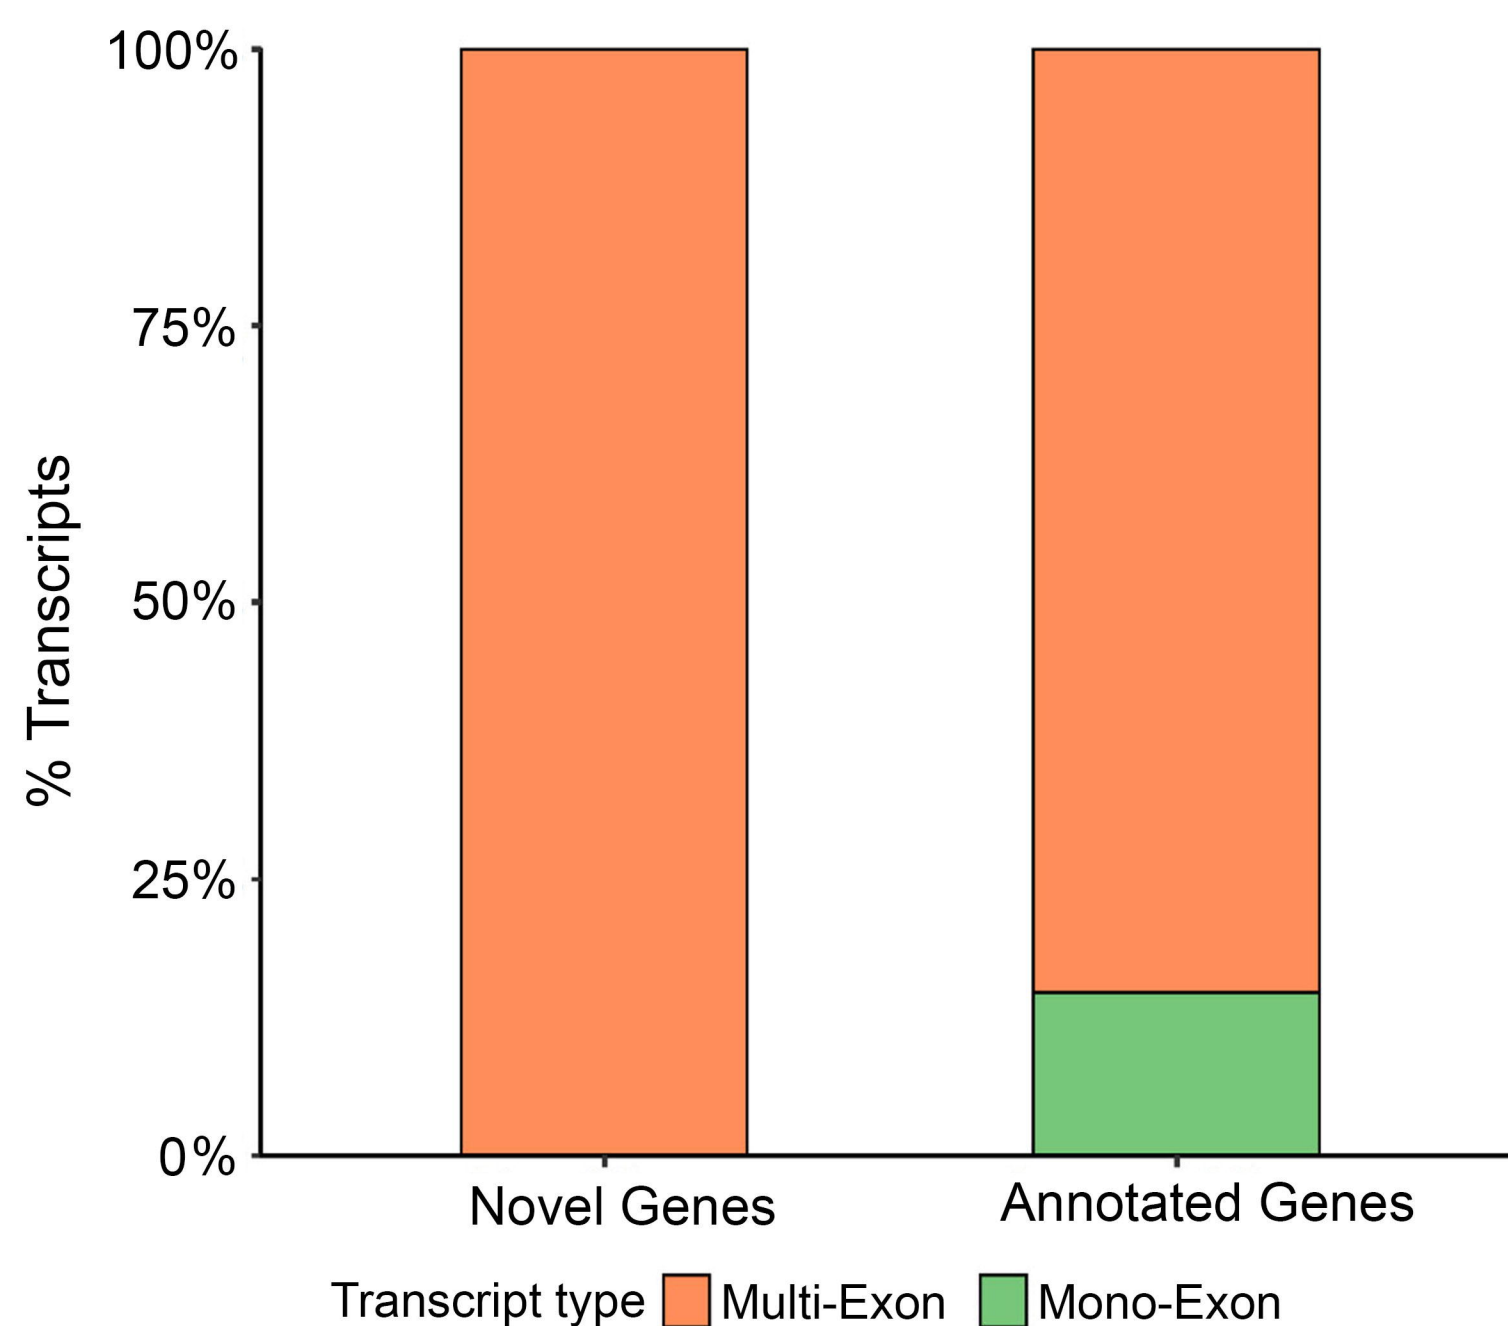

### E

- distance: upstream of polyA site
- + distance: downstream of polyA site

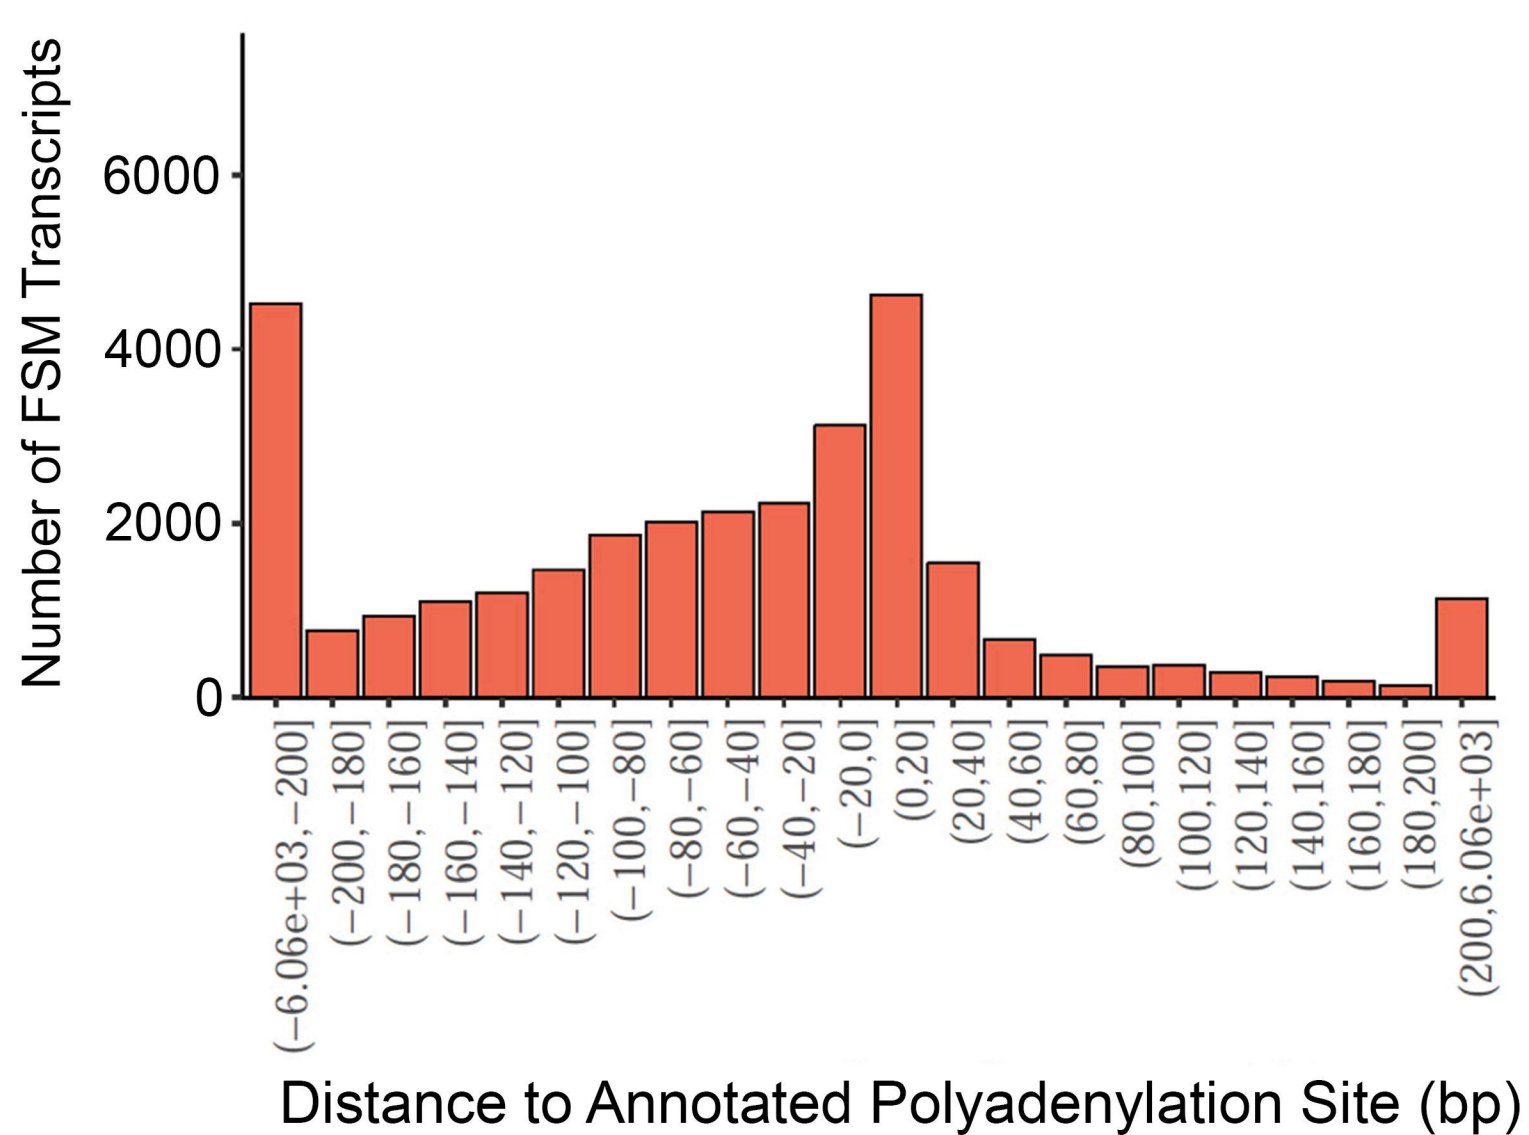

### F

- distance: downstream of TSS
- + distance: upstream of TSS

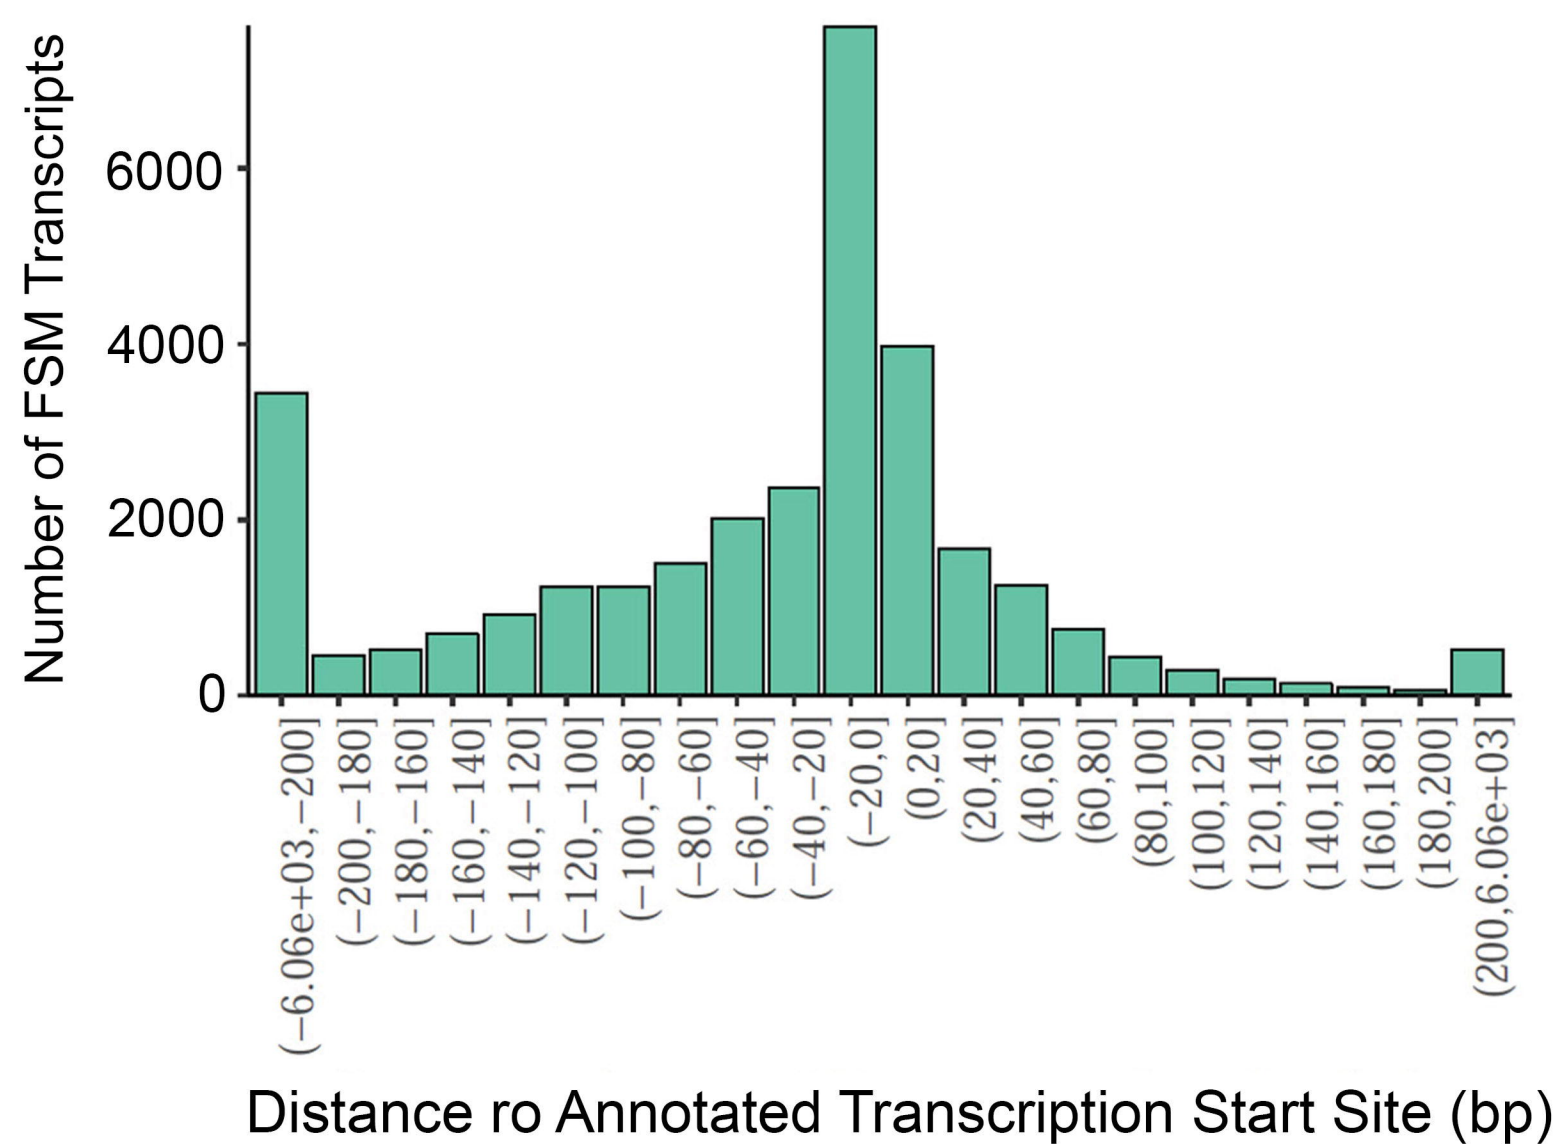

A

## ALIGNMENT

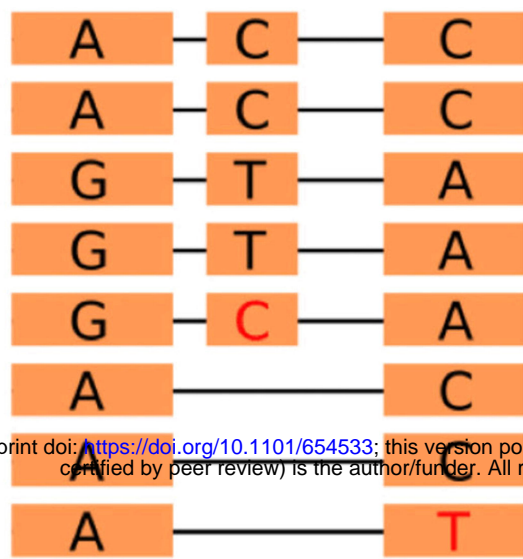

## SNP CALLING

| Position | SNPs |
|----------|------|
| POS1     | A, G |
| POS2     | C, T |
| POS3     | C, A |

## PHASING

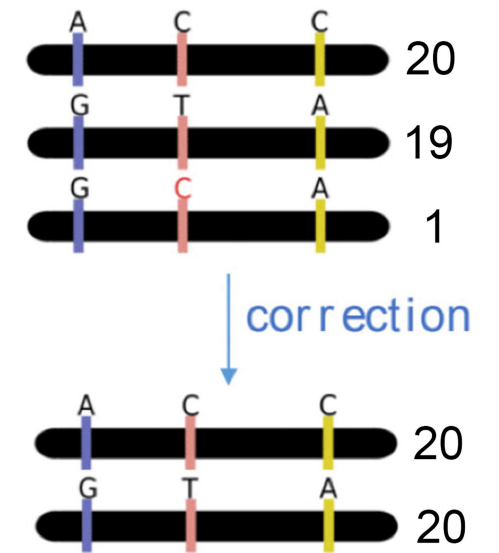

bioRxiv preprint doi: <https://doi.org/10.1101/654533>; this version posted May 31, 2019. The copyright holder for this preprint (which was not certified by peer review) is the author/funder. All rights reserved. No reuse allowed without permission.

## VCF OUTPUT

```
##fileformat=VCFv4.2
#CHROM POS ID REF ALT QUAL FILTER INFO FORMAT ISOFORM1 ISOFORM2
chr1 105 . A G . PASS DP=40;AF=0.50 GT:HQ 0|1:20,20 0:15
chr1 190 . C T . PASS DP=40;AF=0.50 GT:HQ 0|1:20,20 0:15
chr1 336 . C A . PASS DP=40;AF=0.50 GT:HQ 0|1:20,20 0:15
```

B

## Pooled Reads

B73 FL reads  
Ki11 FL reads  
B73 x Ki11 FL reads  
Ki11 x B73 FL reads

IsoPhase

## Allele and Per-sample Read Counts

|       | B73 | Ki11 | B73xKi11 | Ki11xB73 |
|-------|-----|------|----------|----------|
| A-C-C | 30  | 0    | 15       | 15       |
| G-T-A | 0   | 20   | 15       | 3        |

## Final Results

Phase 0 (B73) : A-C-C  
Phase 1 (Ki11) : G-T-A  
B73 x Ki11 : 15, 15  
Ki11 x B73 : 15, 3

Identify B73-only allele as phase0  
Identify Ki11-only allele as phase1

IsoPhase is run individually for each gene

# A chr4

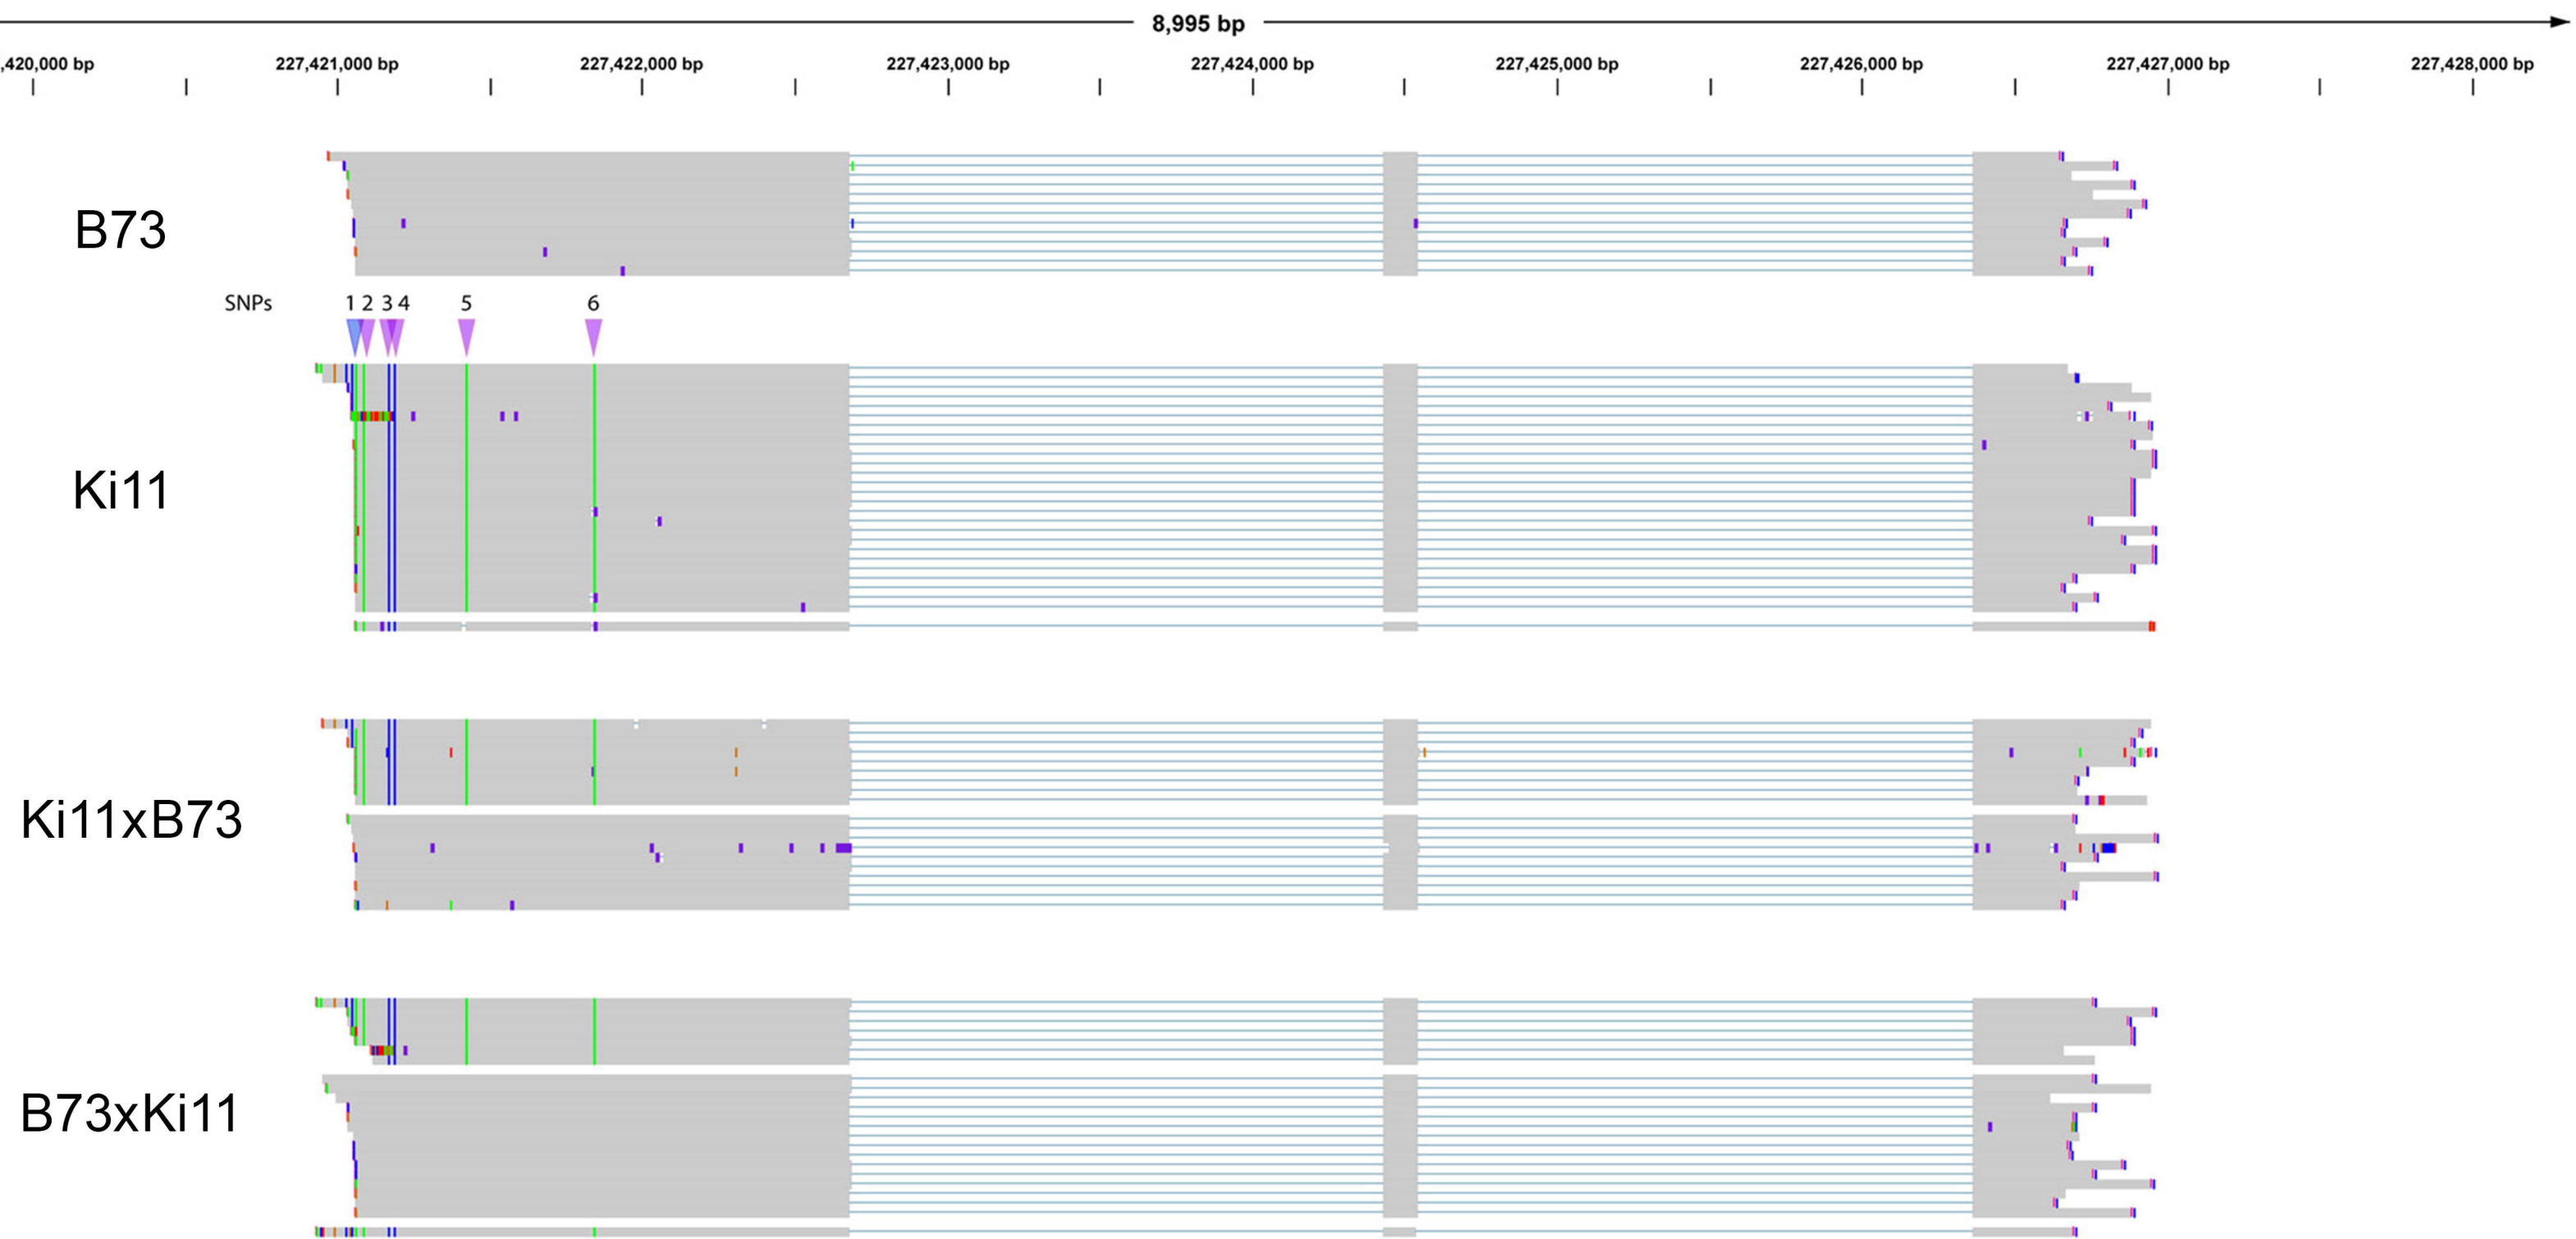

bioRxiv preprint doi: <https://doi.org/10.1101/654533>; this version posted May 31, 2019. The copyright holder for this preprint (which was not certified by peer review) is the author/funder. All rights reserved. No reuse allowed without permission.

# B chr6

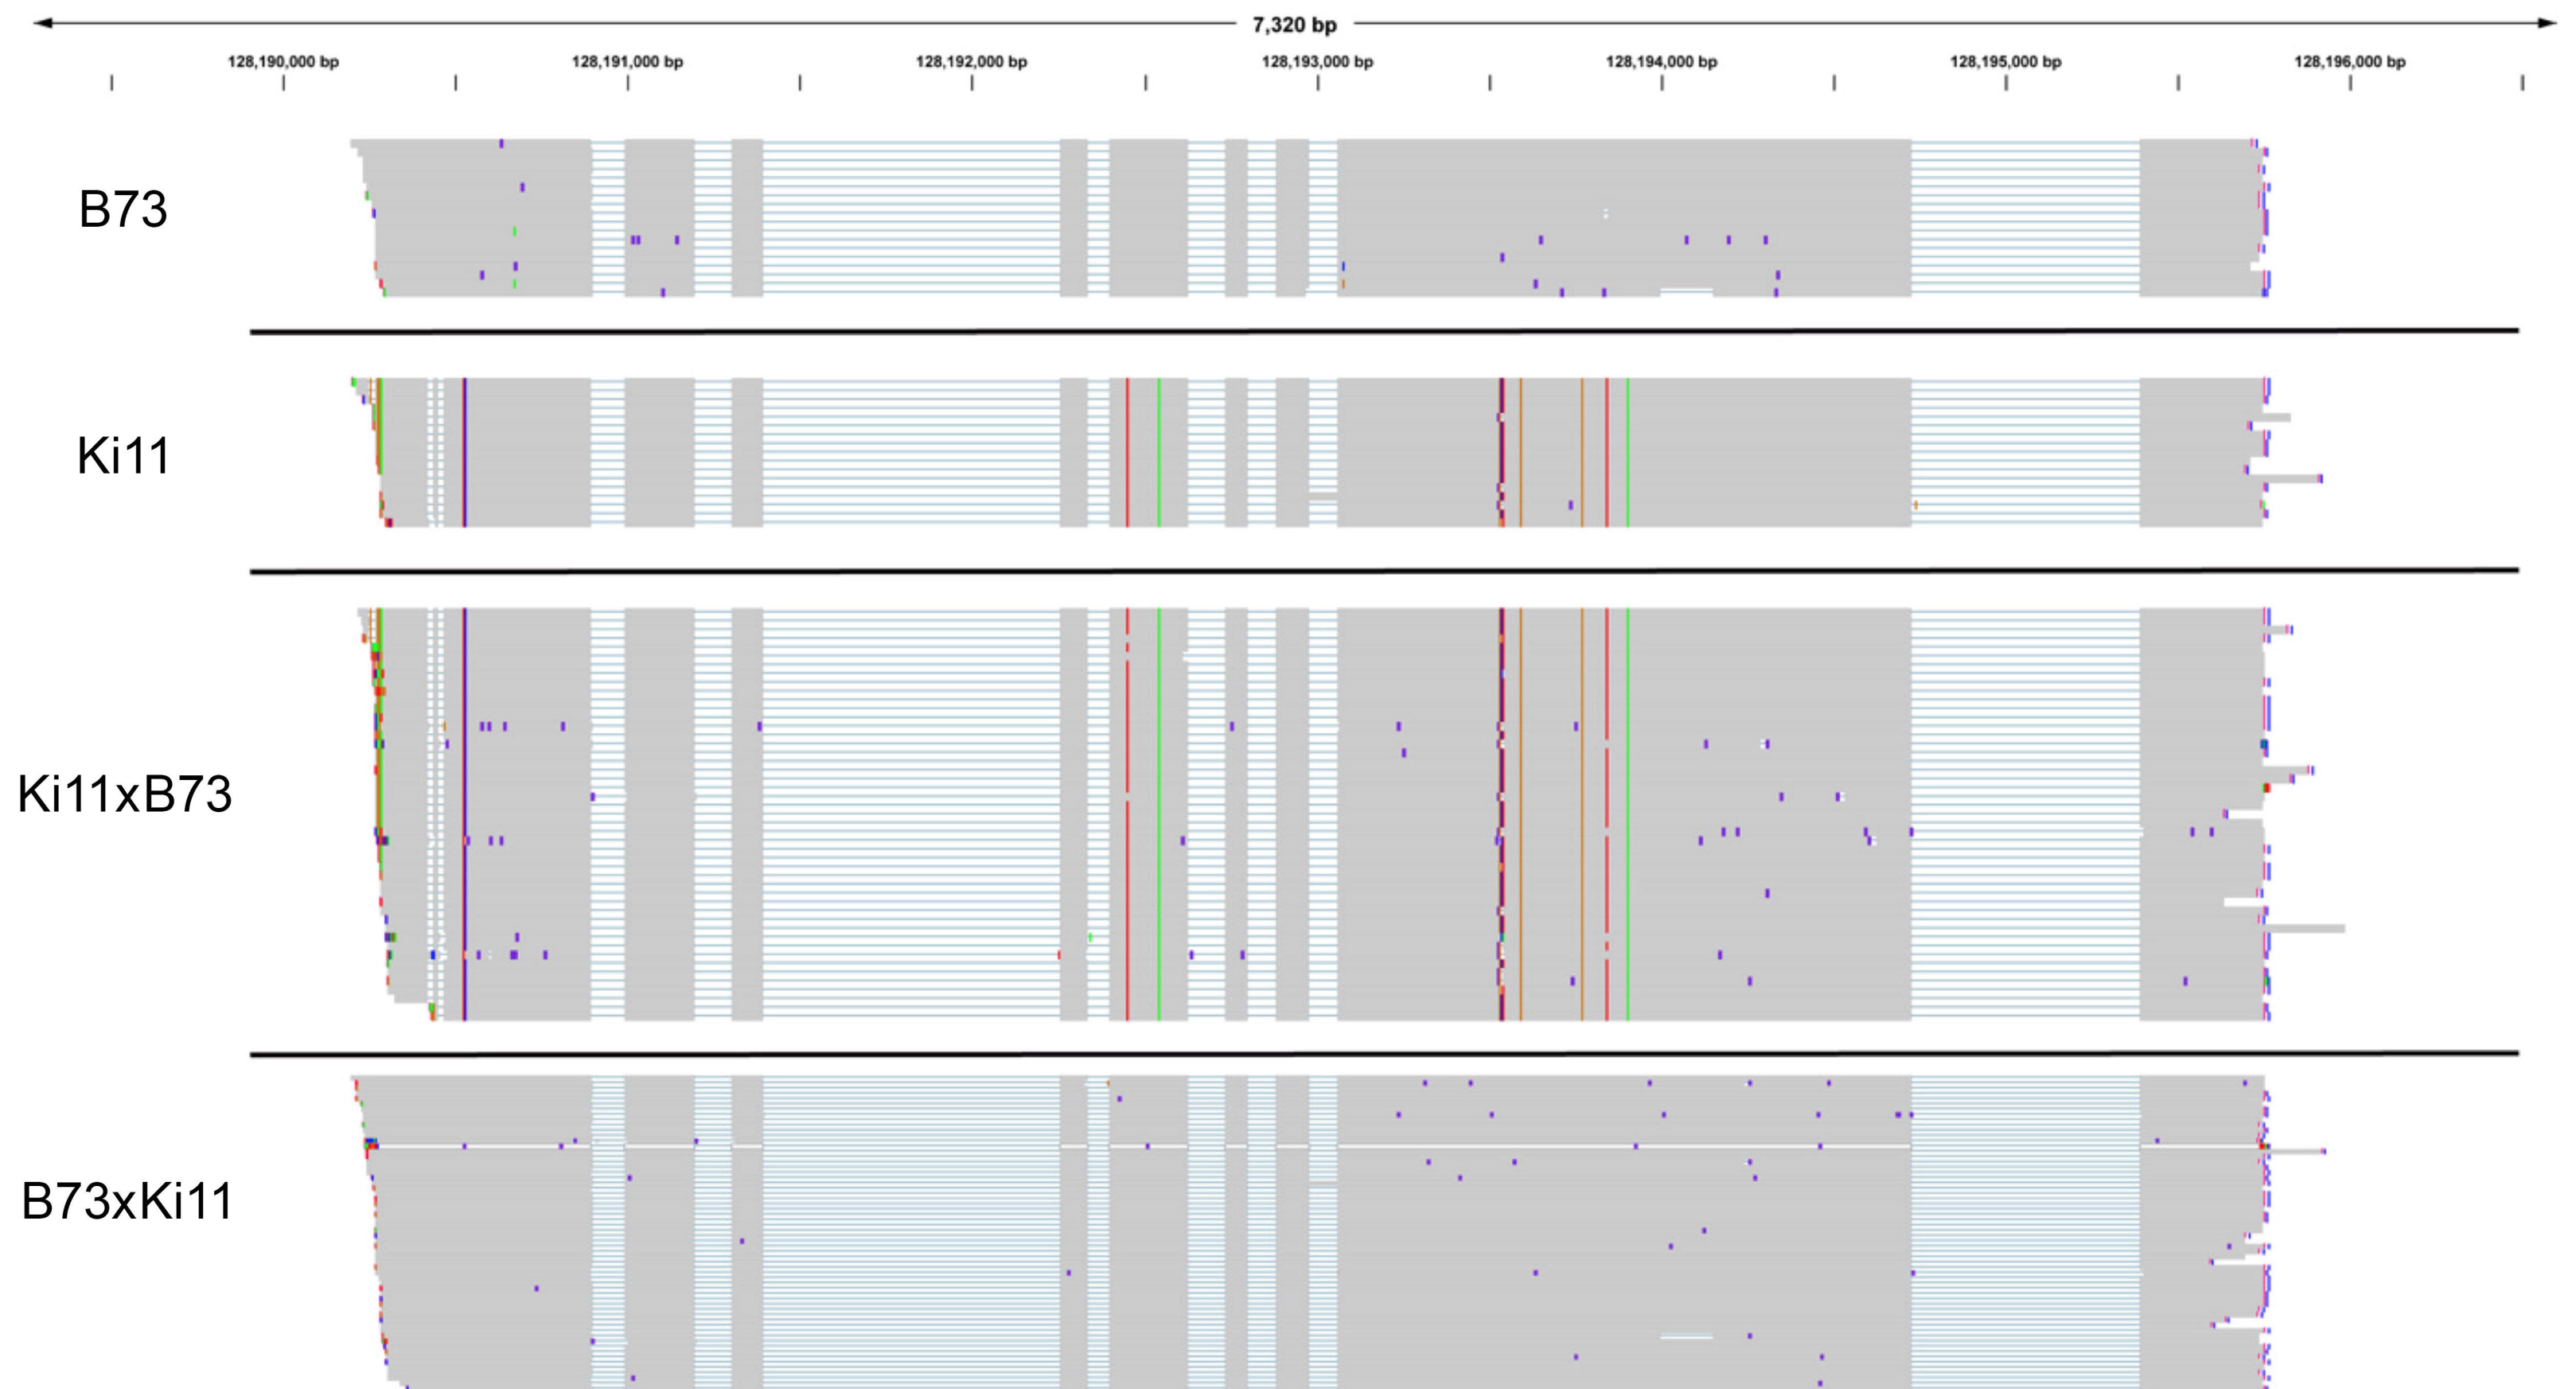

chr3

11 kb

53,864 kb

53,866 kb

53,868 kb

53,870 kb

53,872 kb

53,874 kb

B73

Ki11

Ki11xB73

B73xKi11

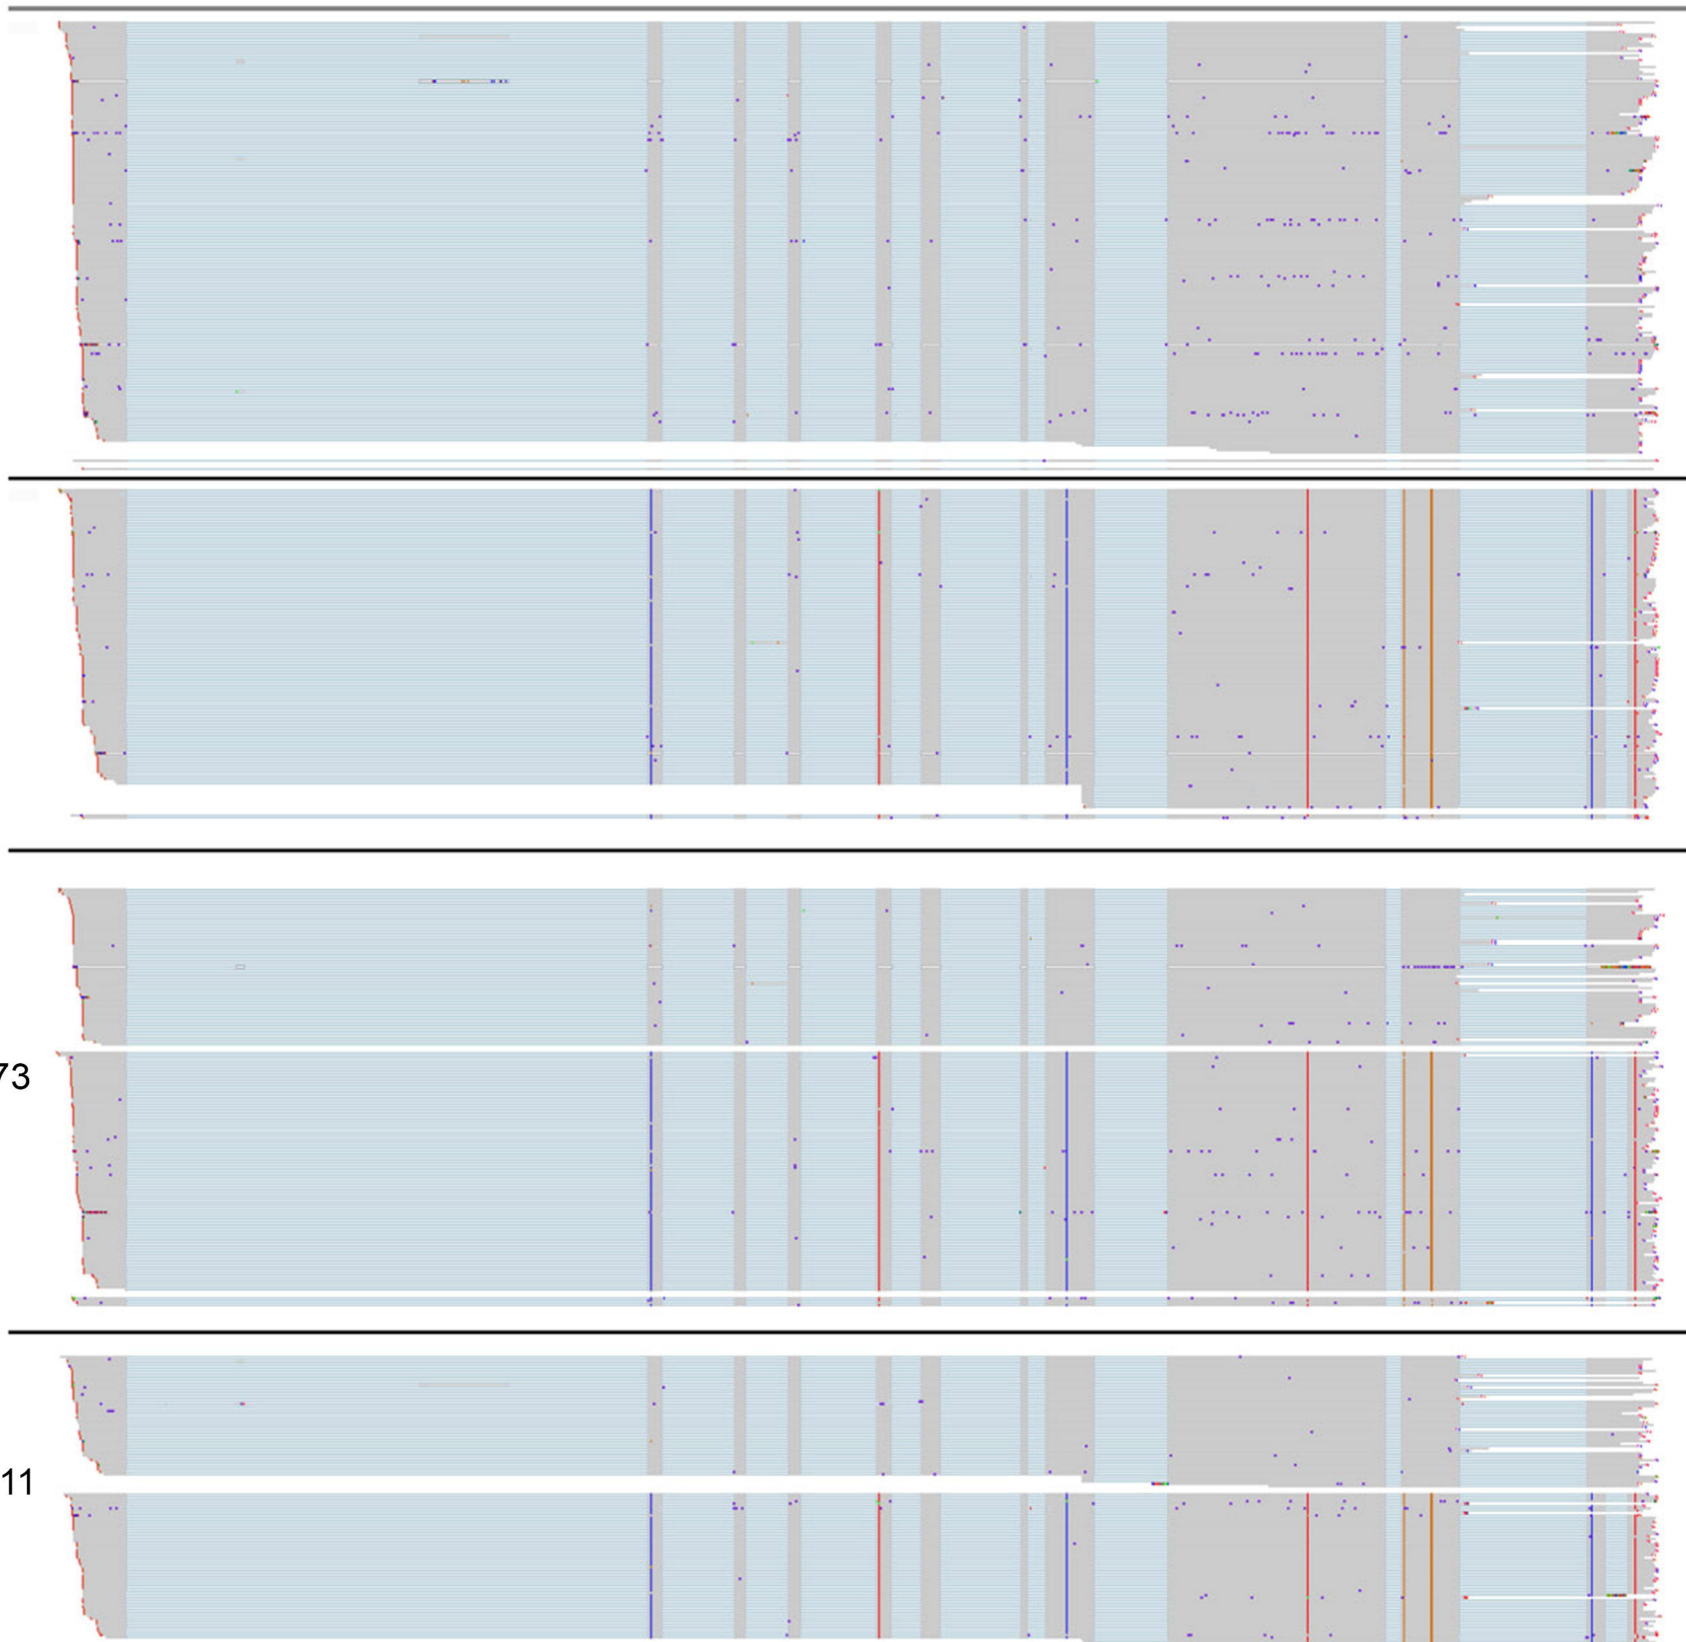

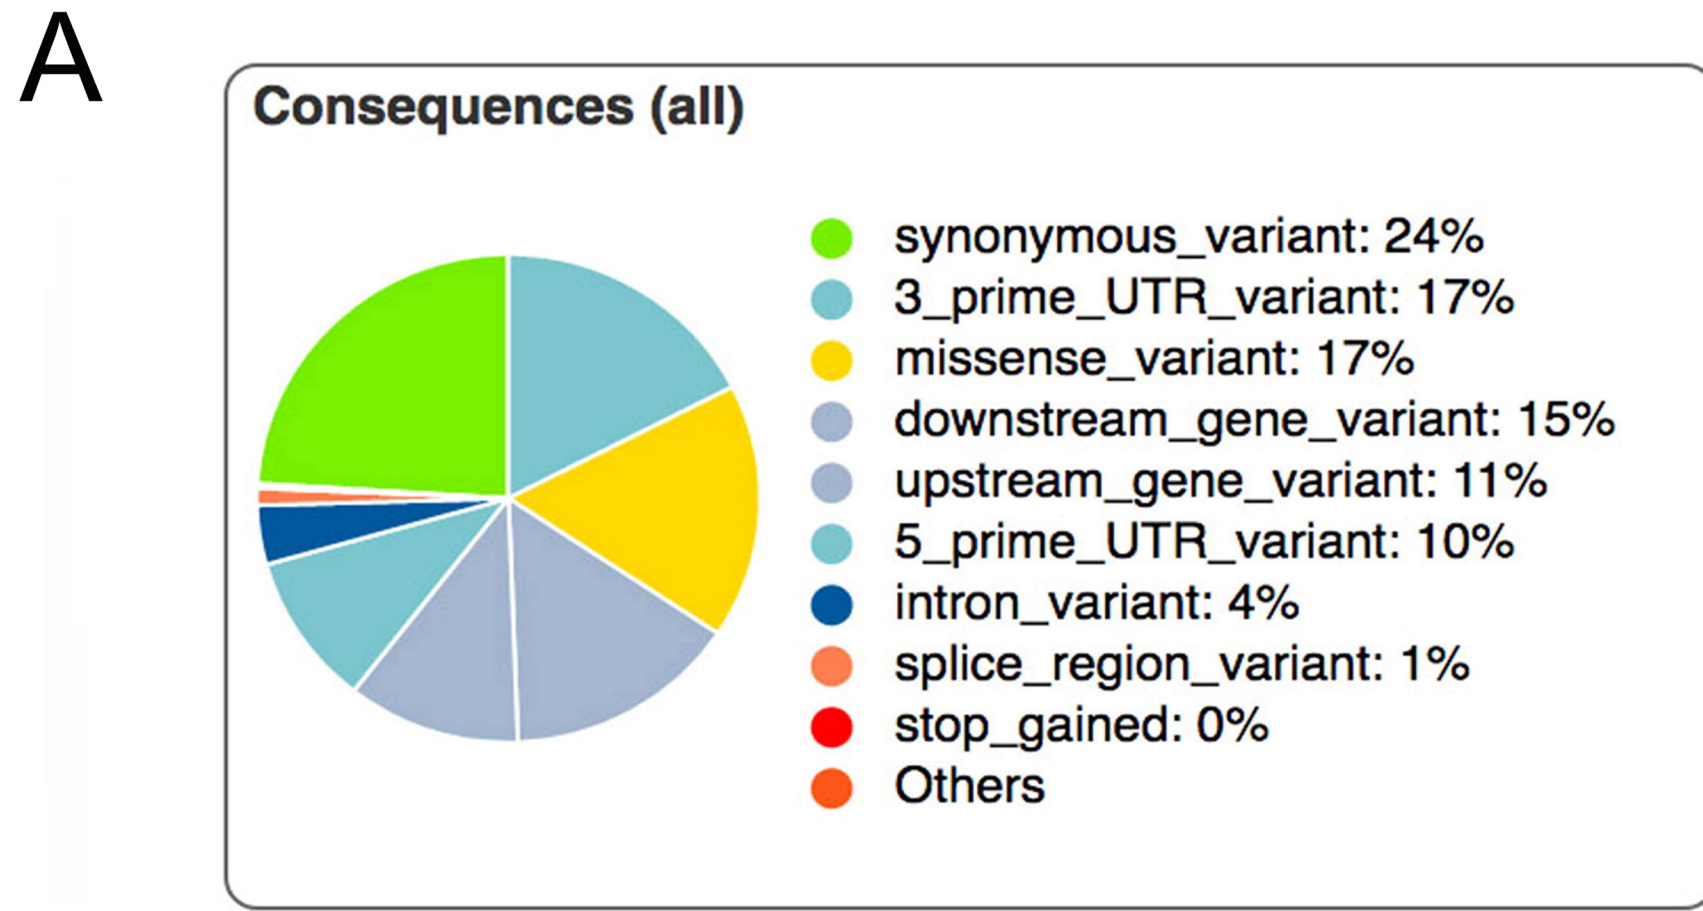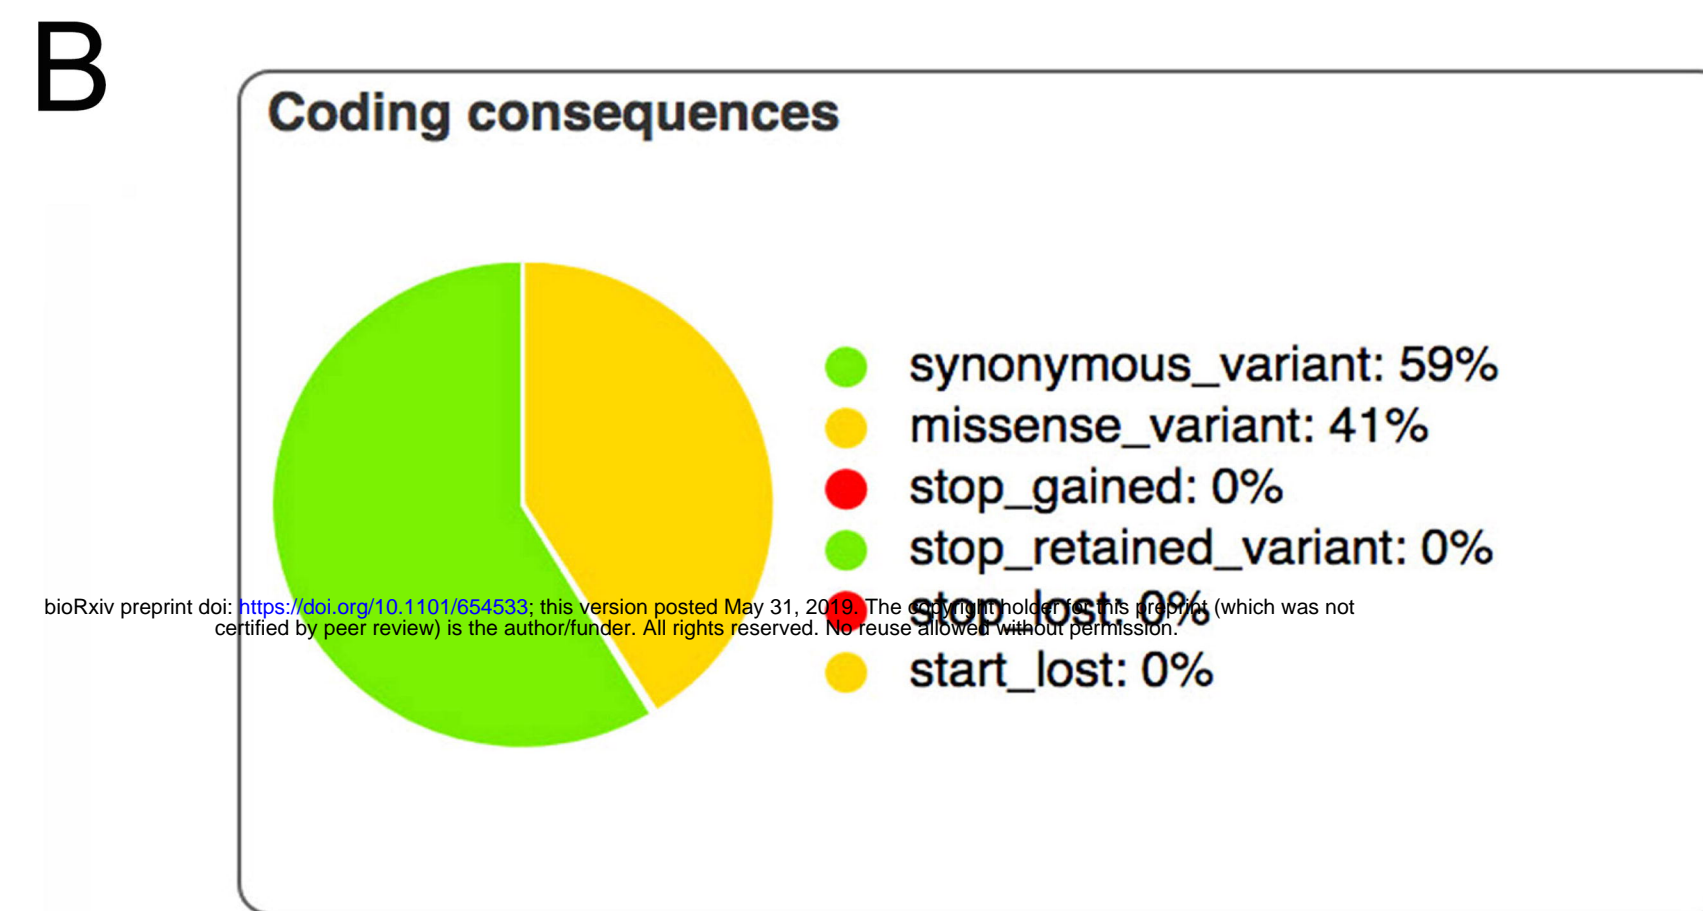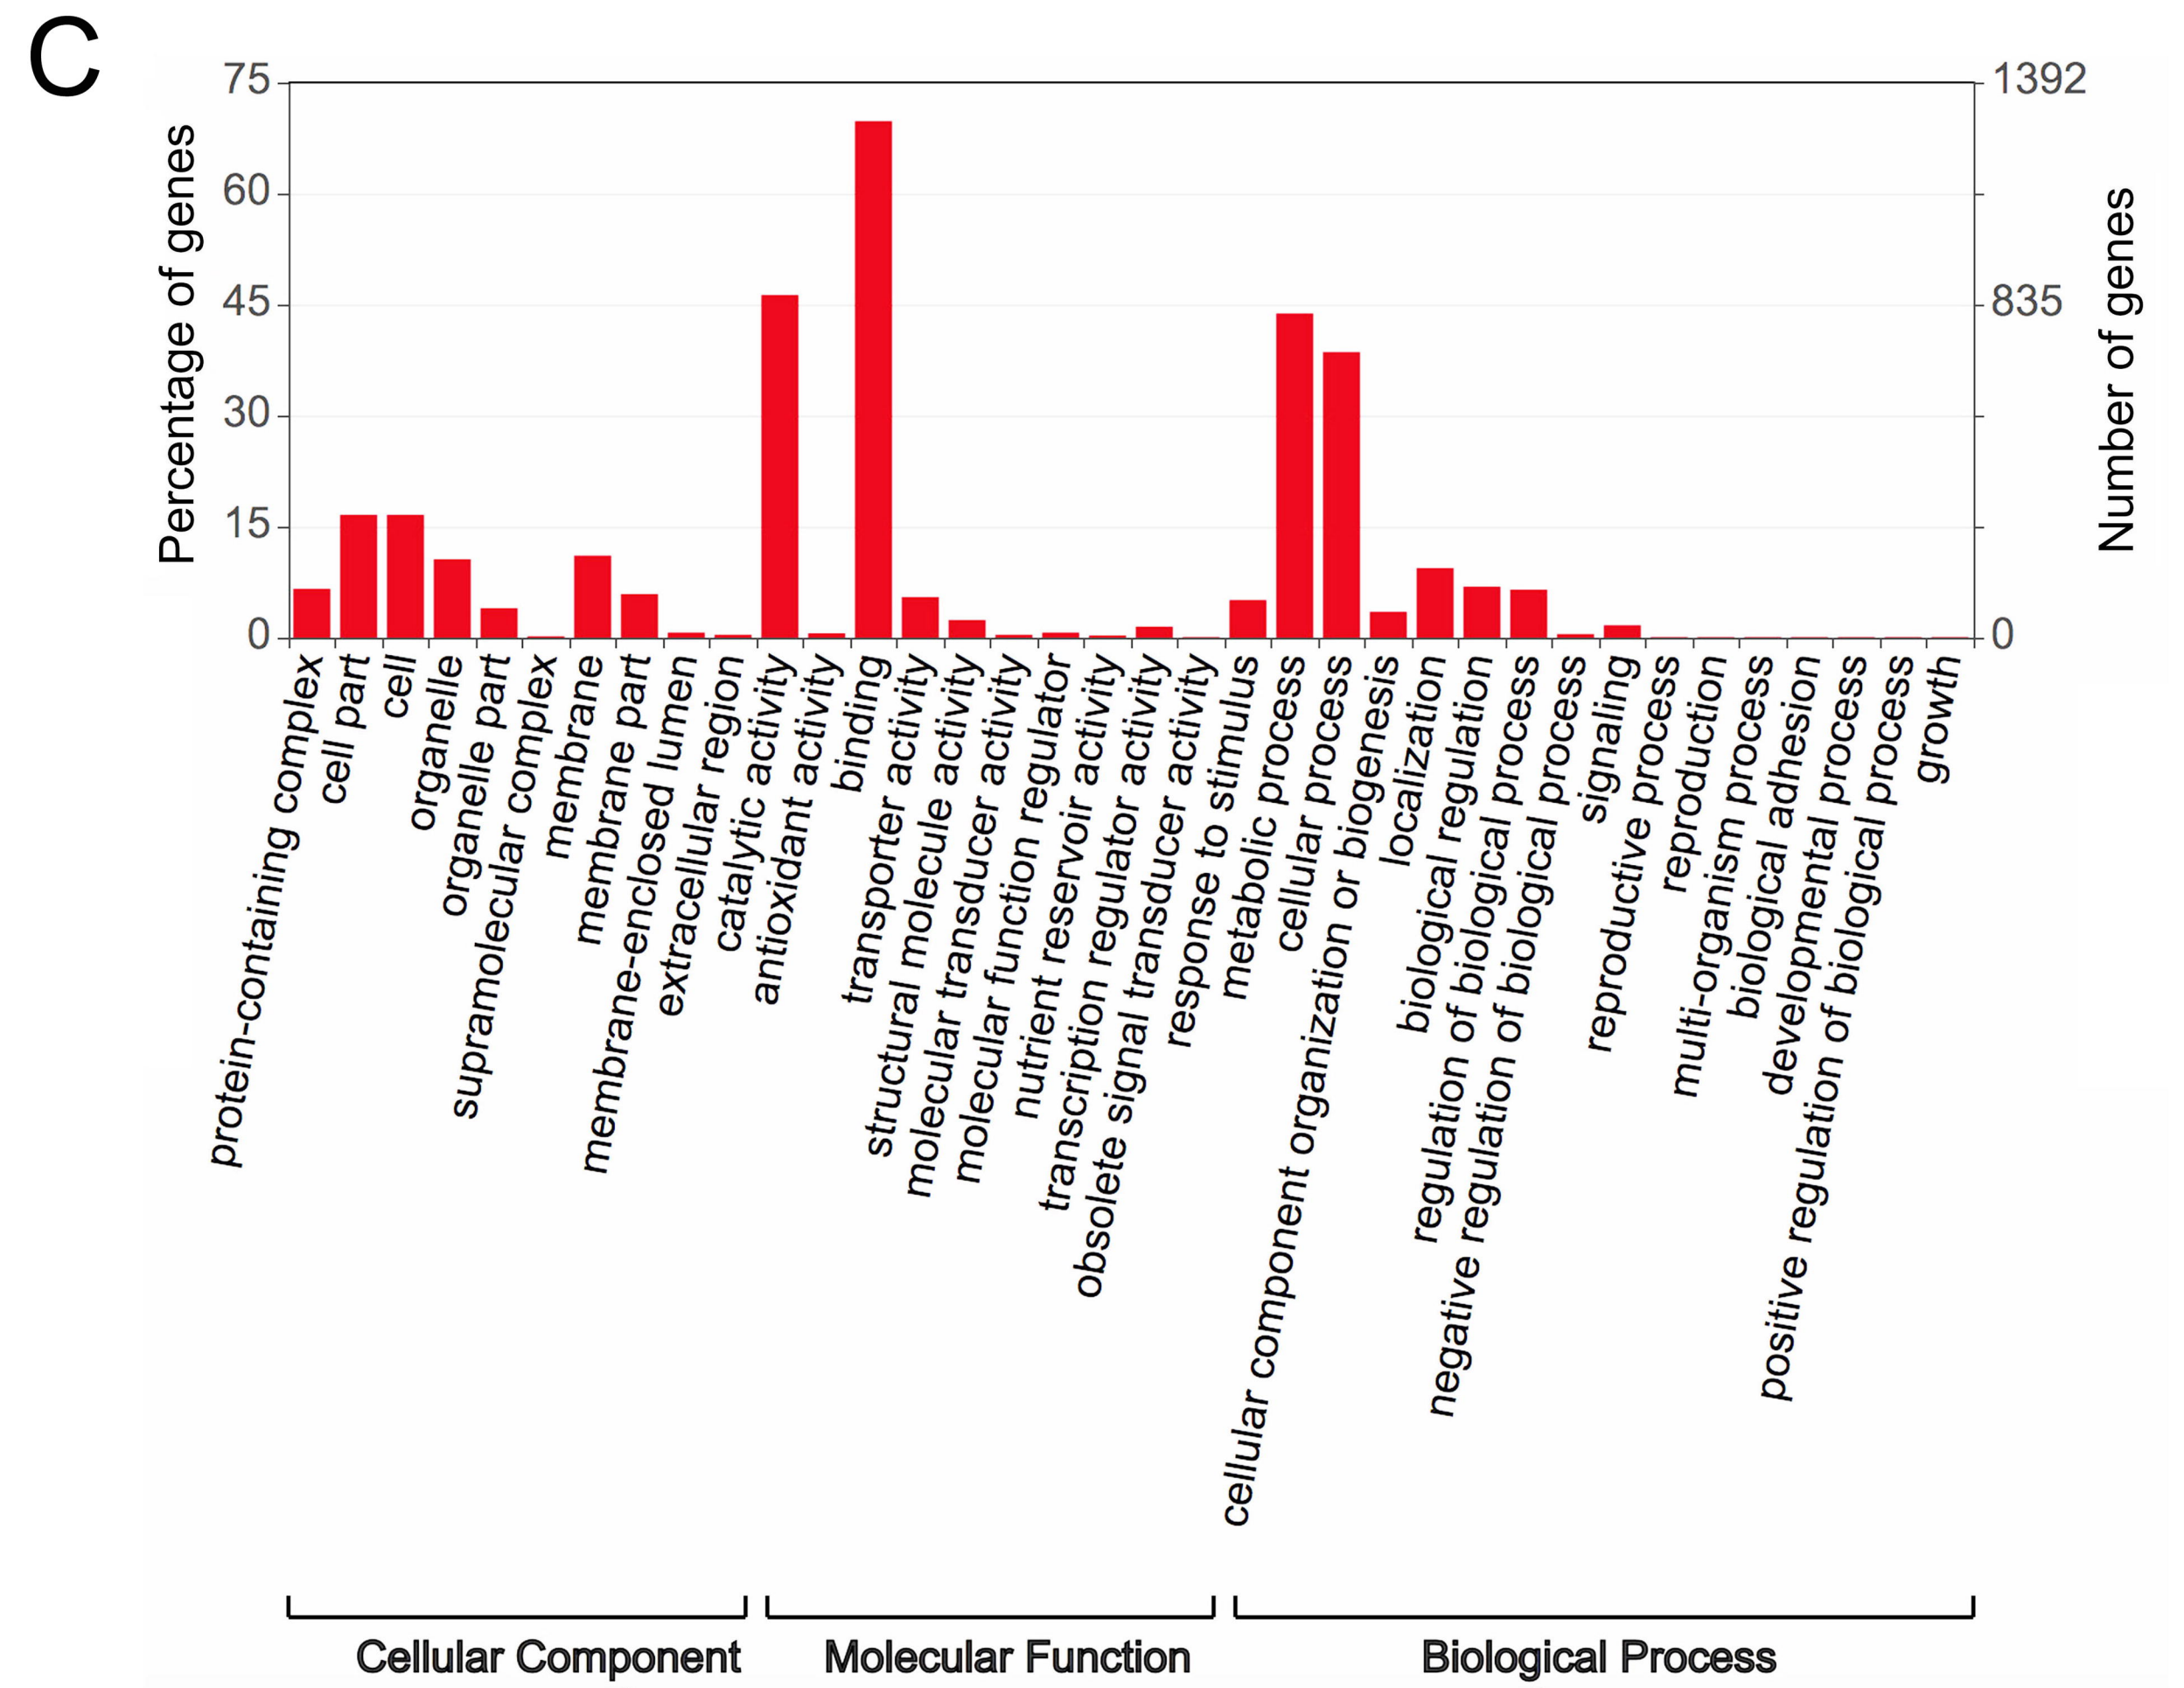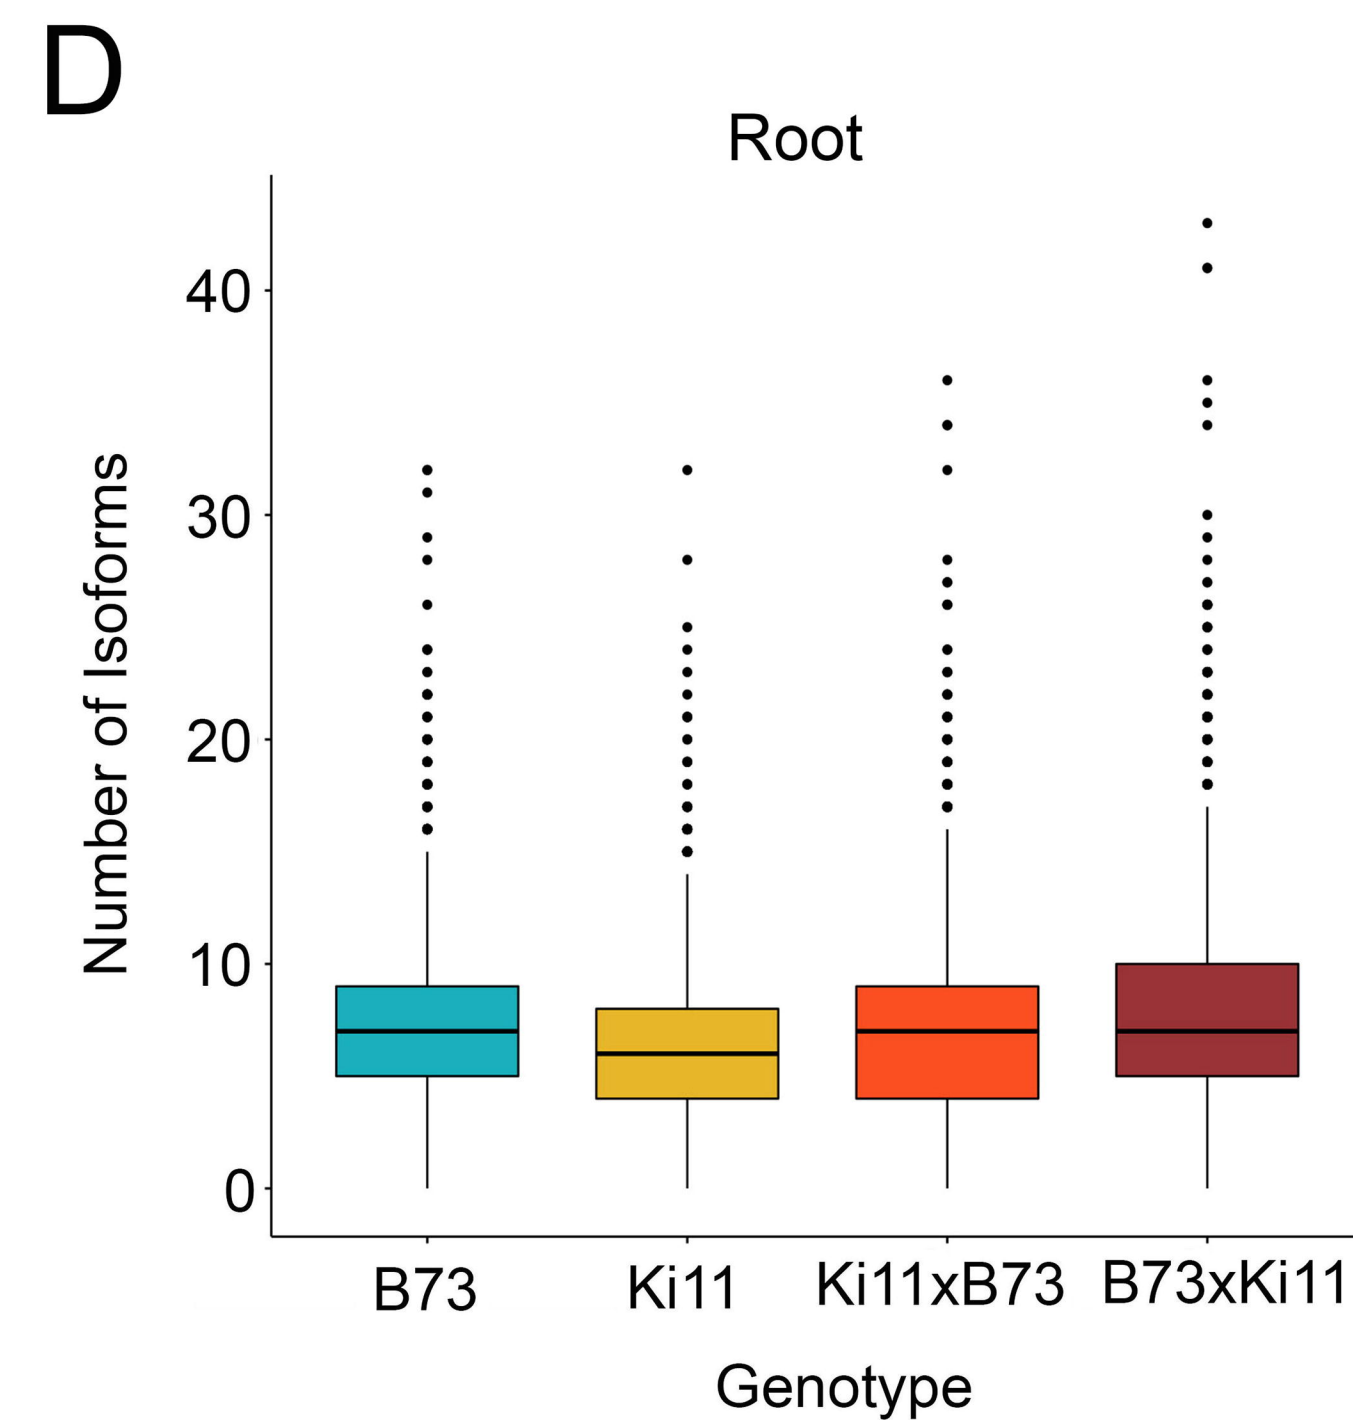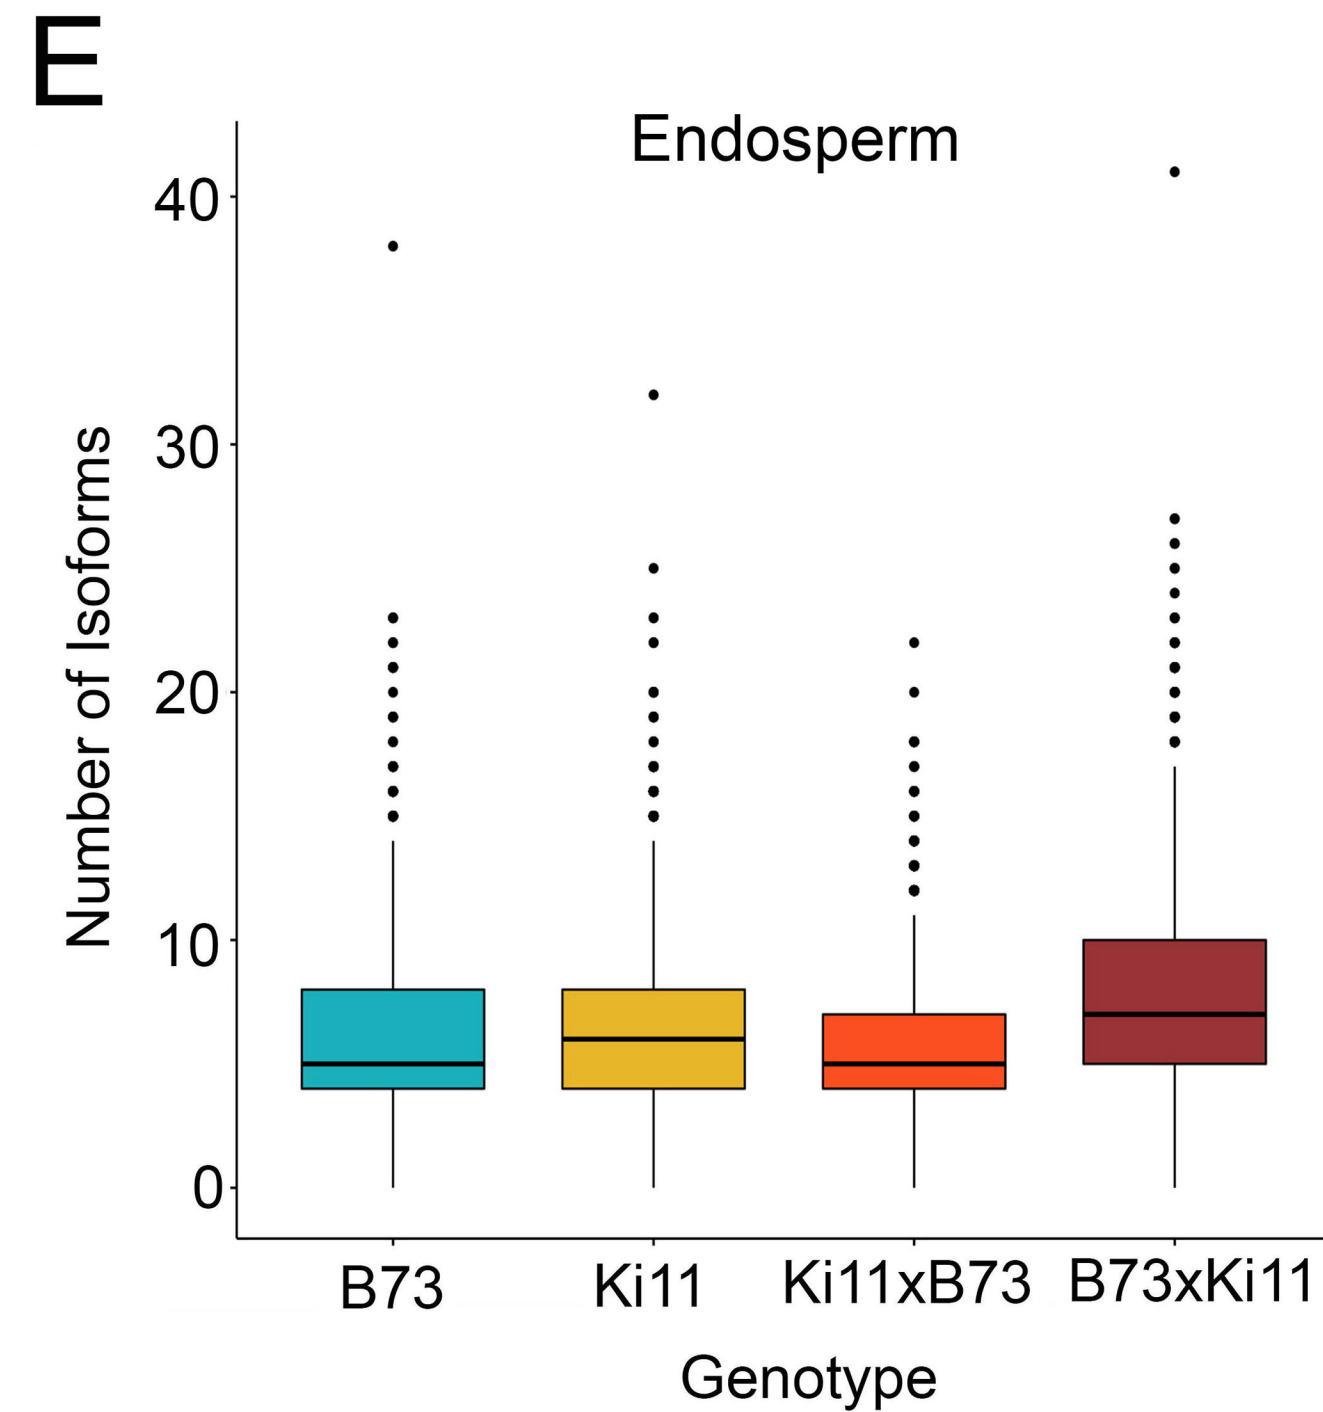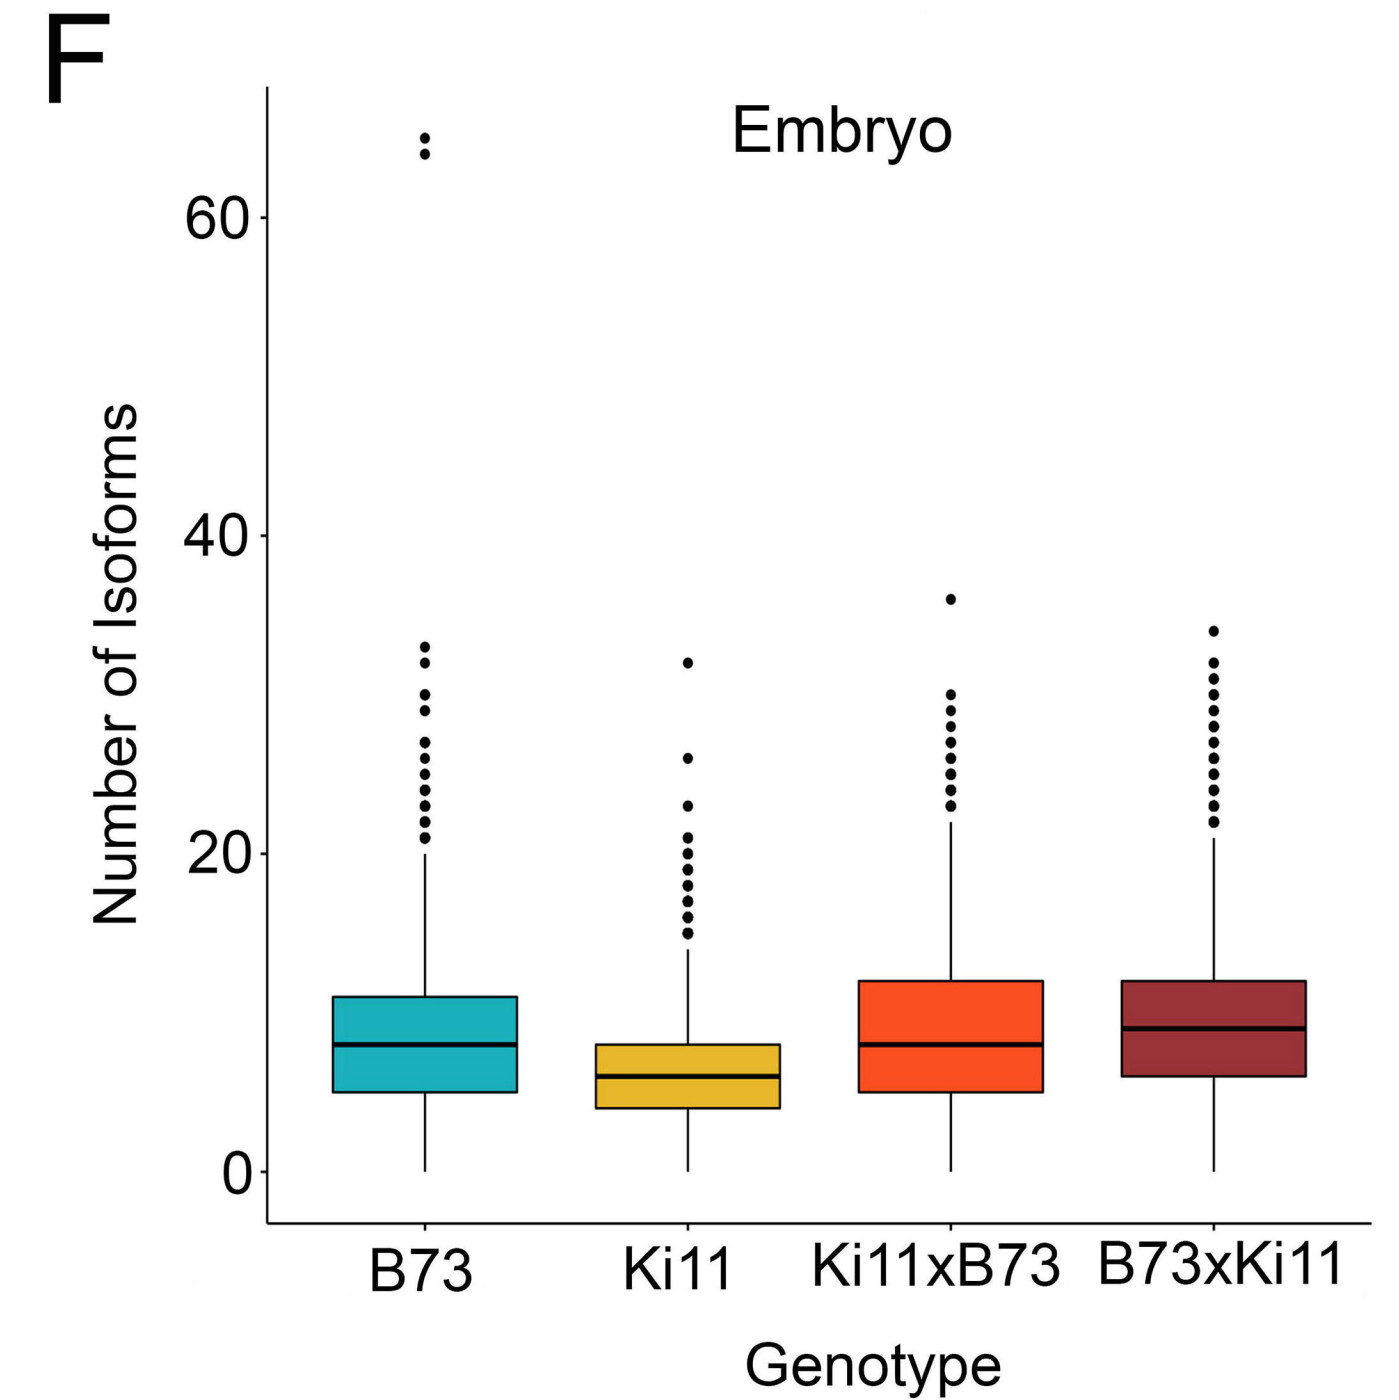



**A** Imprinted.embryoMEG.allele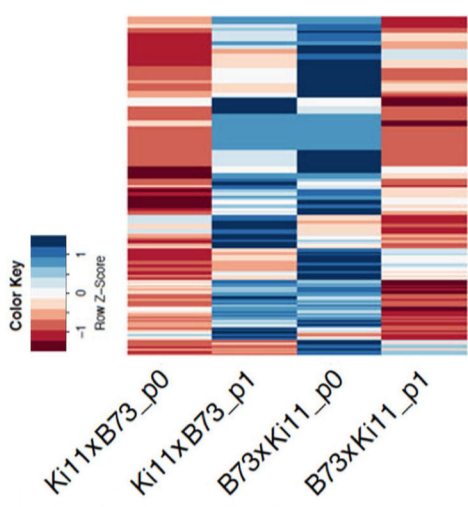**B** Imprinted.endospermMEG.allele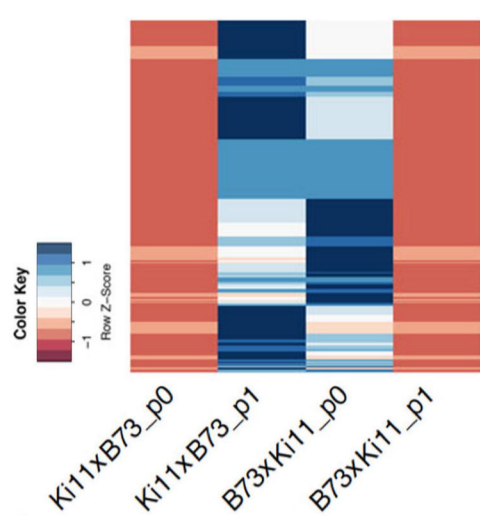**C** Imprinted.rootMEG.allele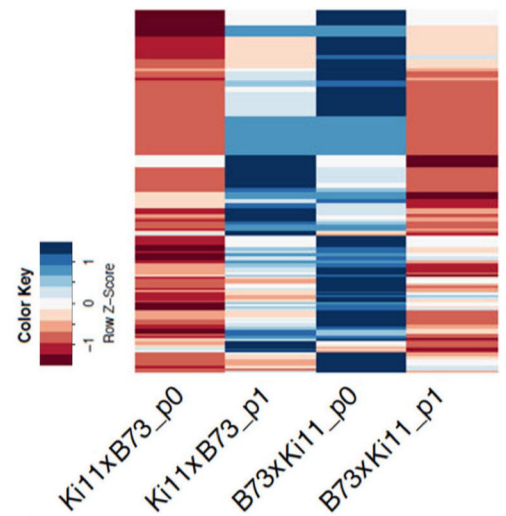**D** Imprinted.embryoPEG.allele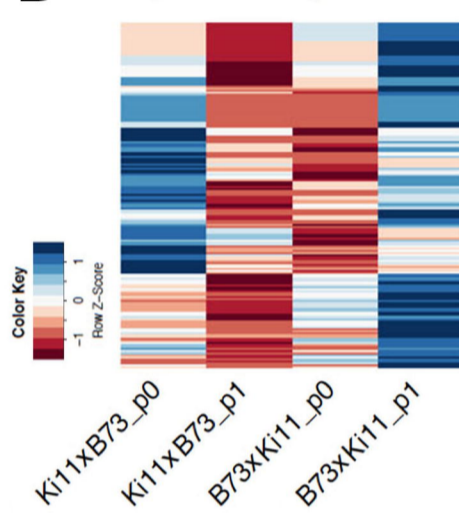**E** Imprinted.endospermPEG.allele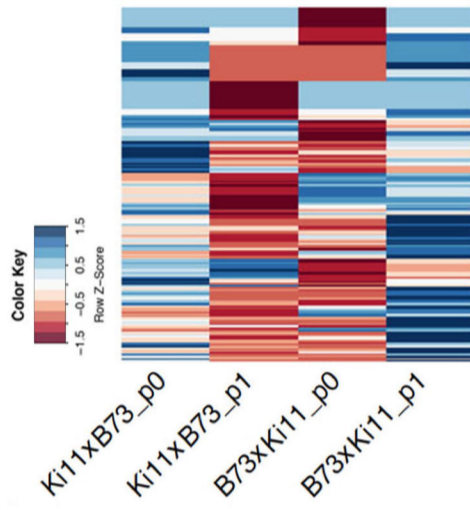**F** Imprinted.rootPEG.allele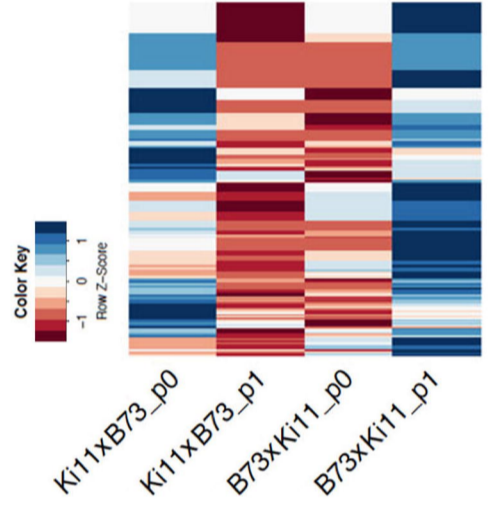**G** Embryo.PEG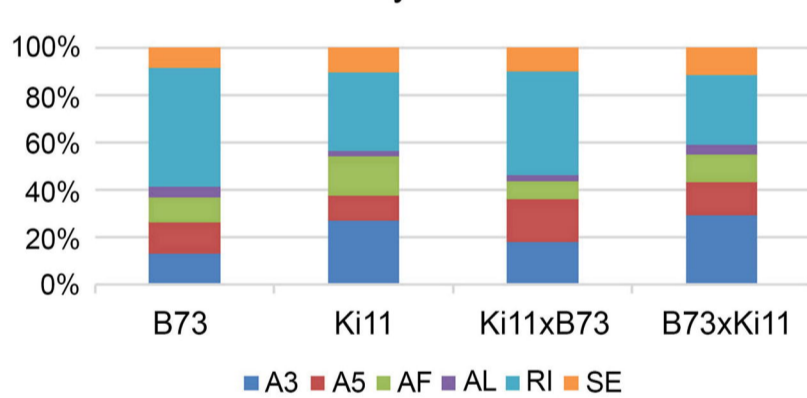**H** Embryo.MEG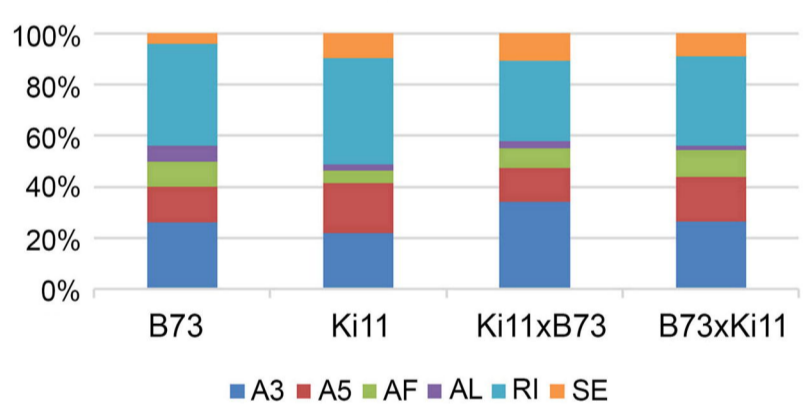**I** Endosperm.PEG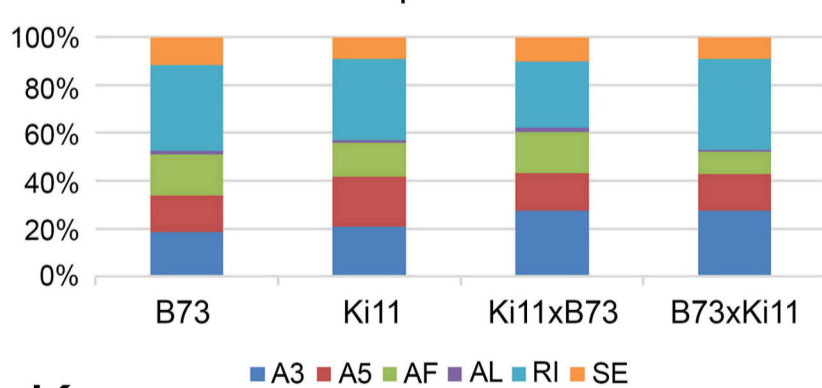**J** Endosperm.MEG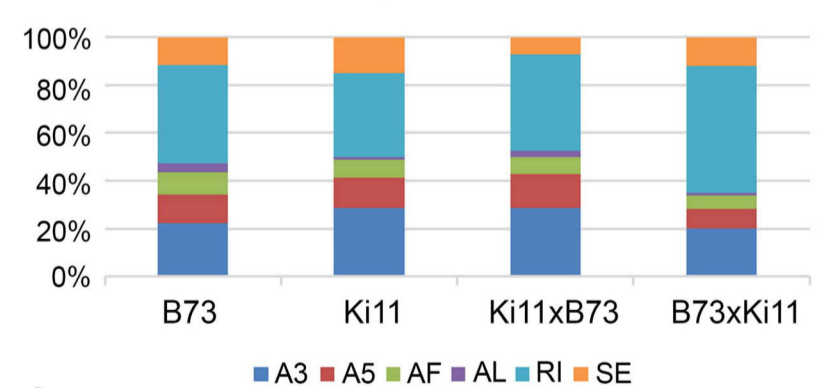**K** Root.PEG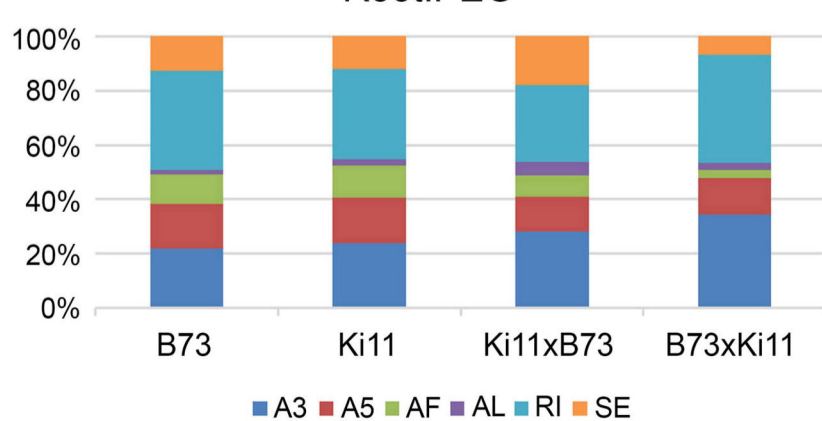**L** Root.MEG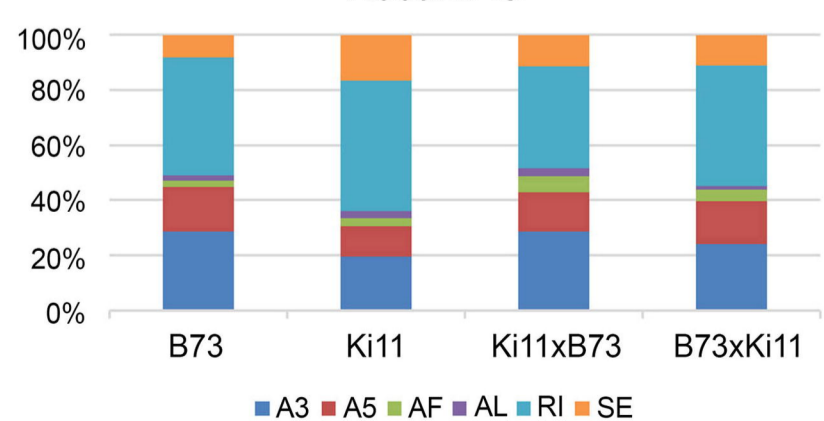

Source: https://www.biorxiv.org/content/10.1101/654533v1.full.pdf
